# Supplementary material for: Betulinic Acid Decorated with Polar Groups and Blue Emitting BODIPY Dye: Synthesis, Cytotoxicity, Cell-Cycle Analysis and Anti-HIV Profiling
Source: MDPI journal article supplement (doi:10.3390/biomedicines9091104), 2021-08-28
Supplement: s1 [file s1]

## **Supplementary Information**

**Betulinic Acid Decorated with Polar Groups and Blue Emitting BODIPY Dye: Synthesis, Cytotoxicity, Cell-Cycle Analysis and Anti-HIV Profiling**

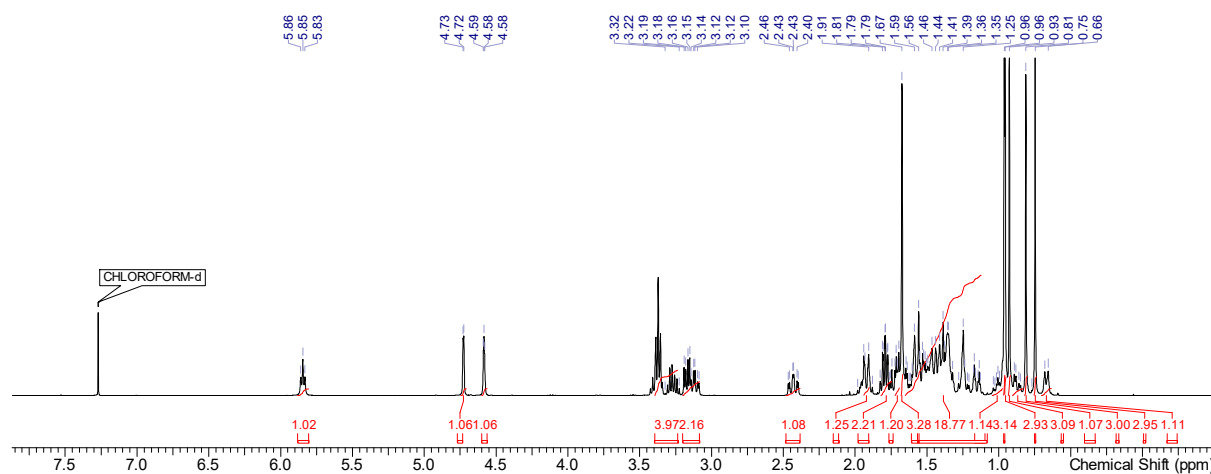

Figure S1.  $^1\text{H}$  NMR of **1** in  $\text{CDCl}_3$ .

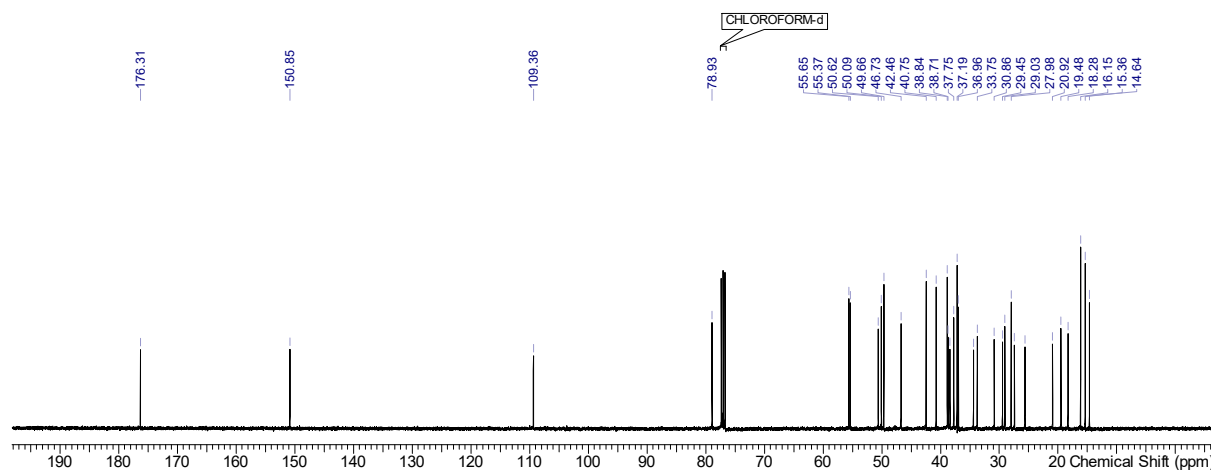

Figure S2.  $^{13}\text{C}$  NMR of **1** in  $\text{CDCl}_3$ .

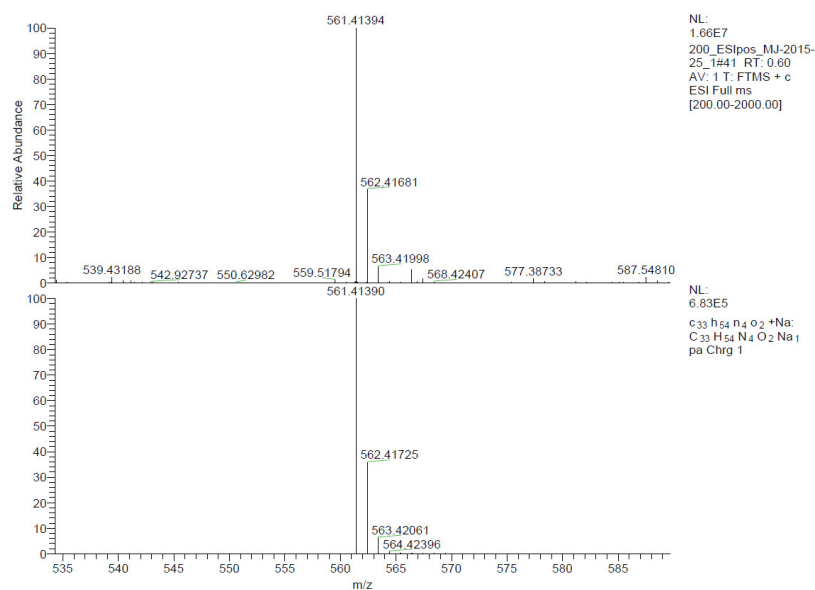

Figure S3. HRMS-ESI spectrum of **1**.

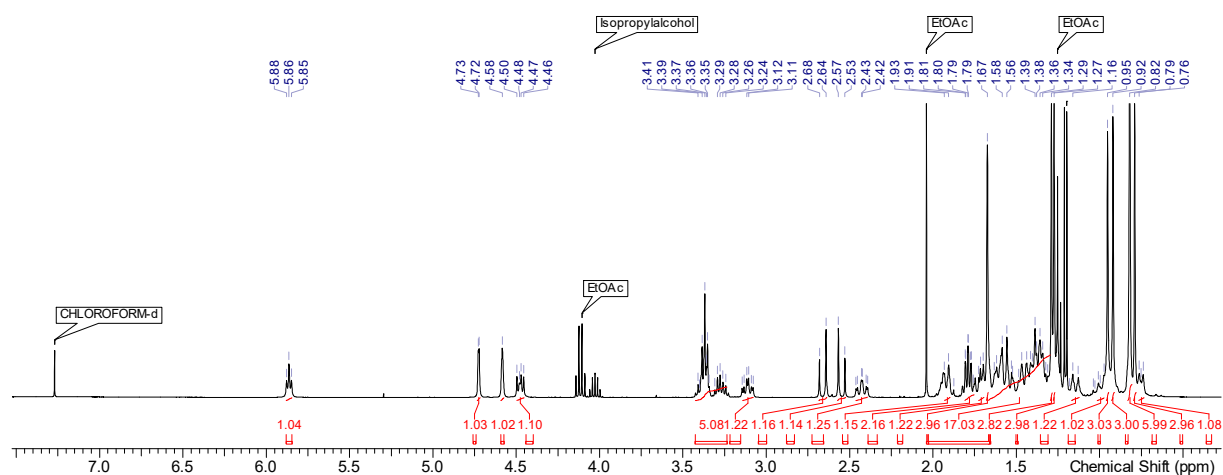

Figure S4.  $^1\text{H}$  NMR of **2** in  $\text{CDCl}_3$ .

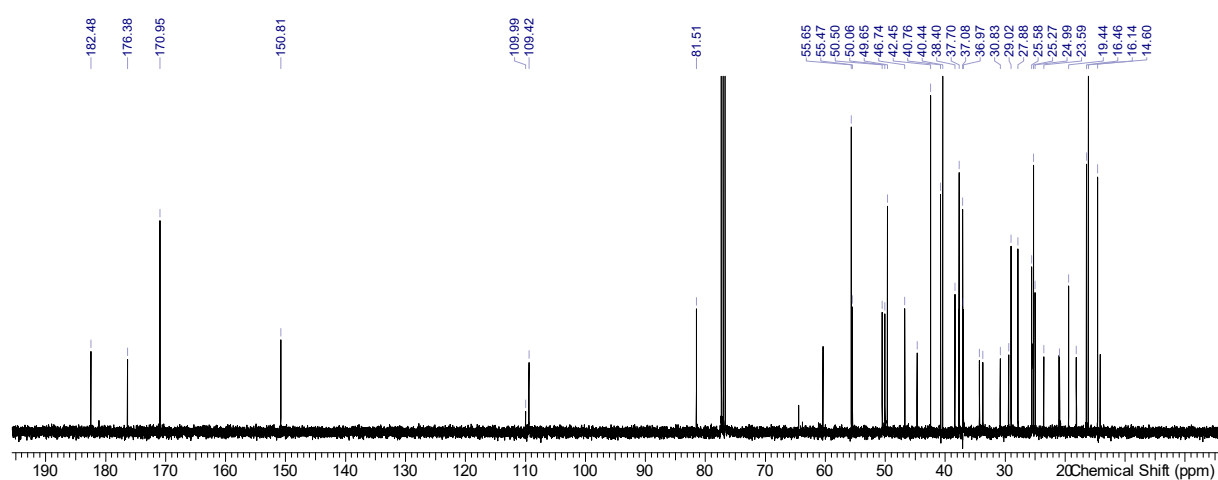

Figure S5.  $^{13}\text{C}$  NMR of **2** in  $\text{CDCl}_3$ .

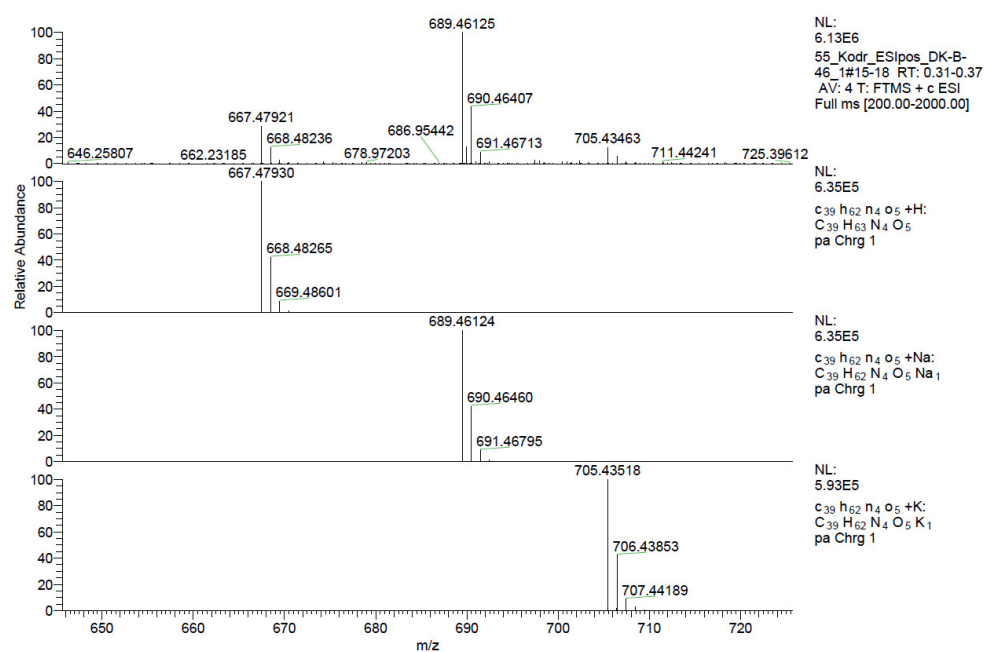

Figure S6. HRMS-ESI spectrum of **2**.

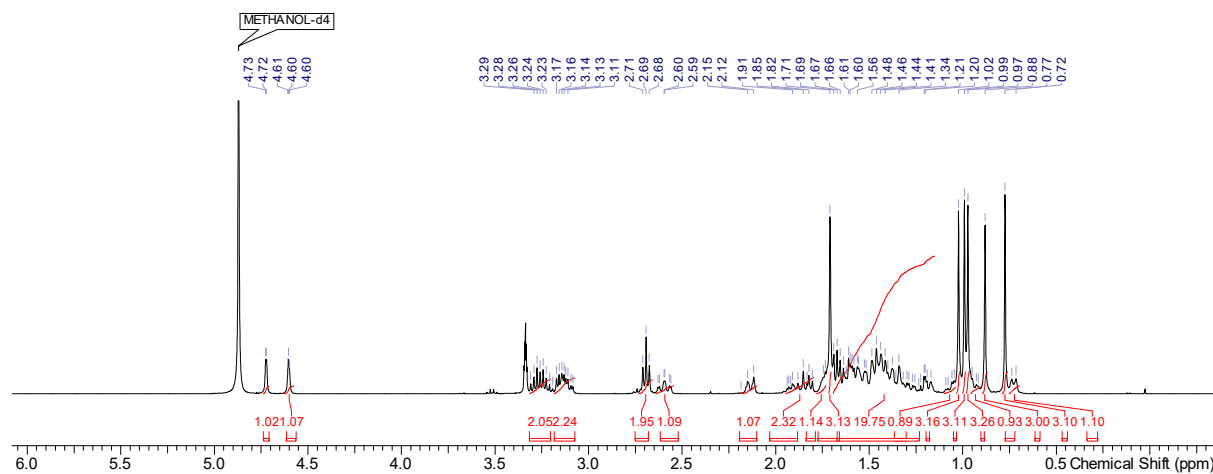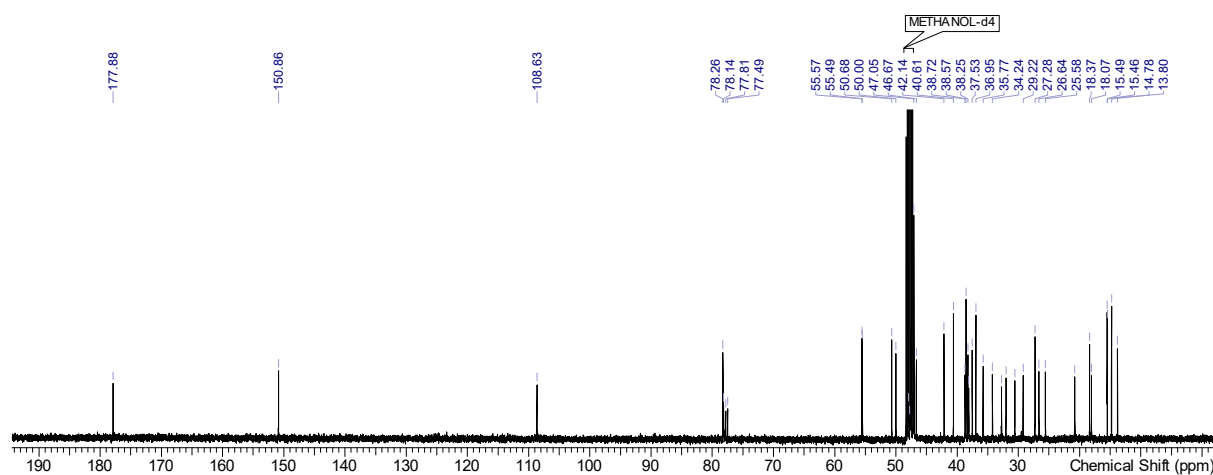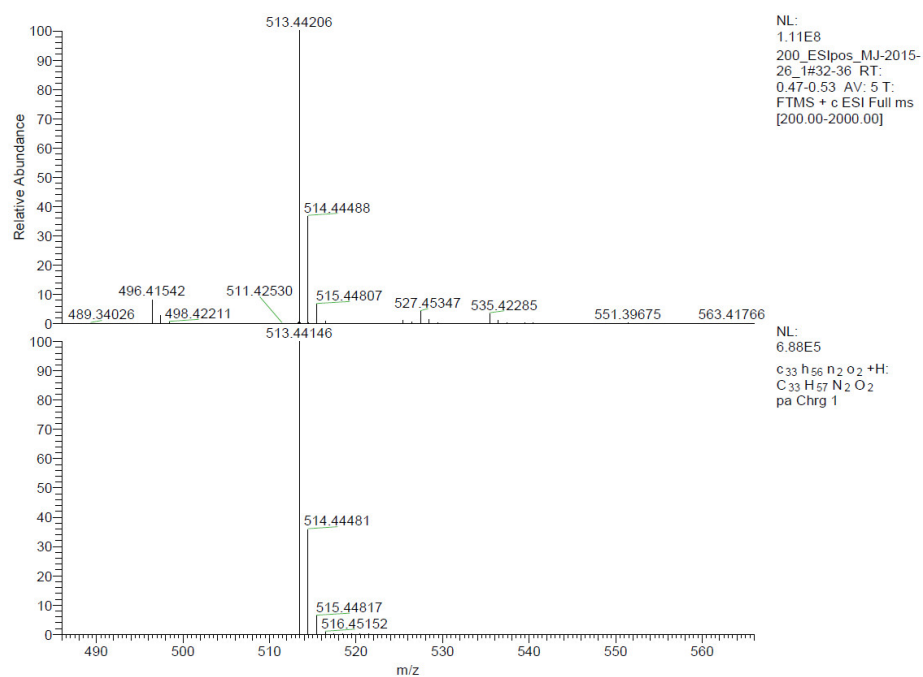

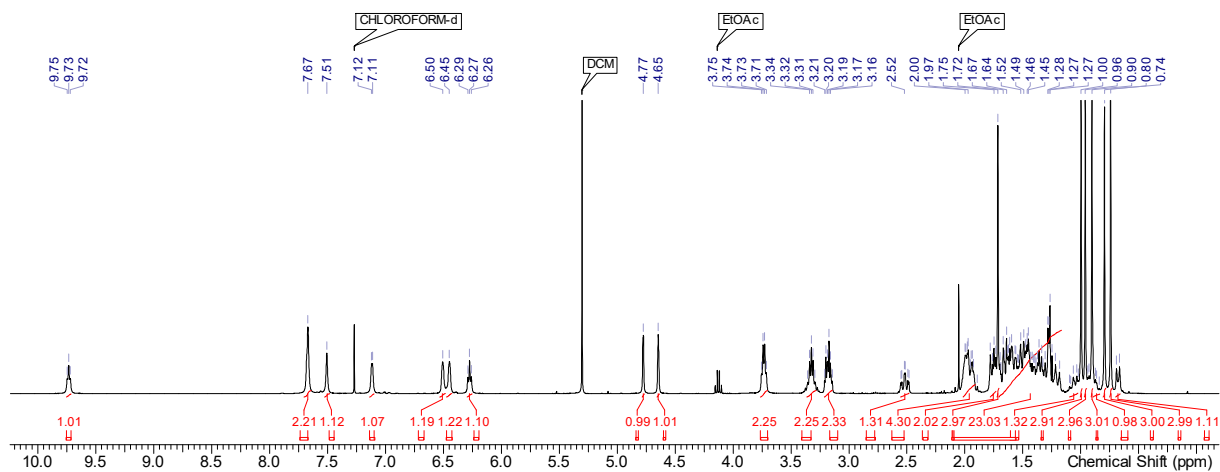

Figure S10.  $^1\text{H}$  NMR of **4** in  $\text{CDCl}_3$ .

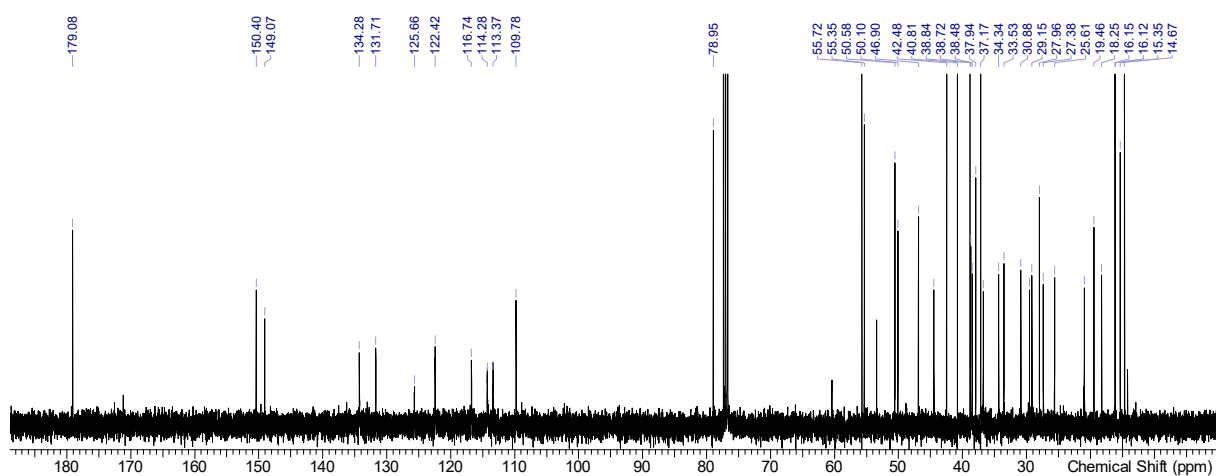

Figure S11.  $^{13}\text{C}$  NMR of **4** in  $\text{CDCl}_3$ .

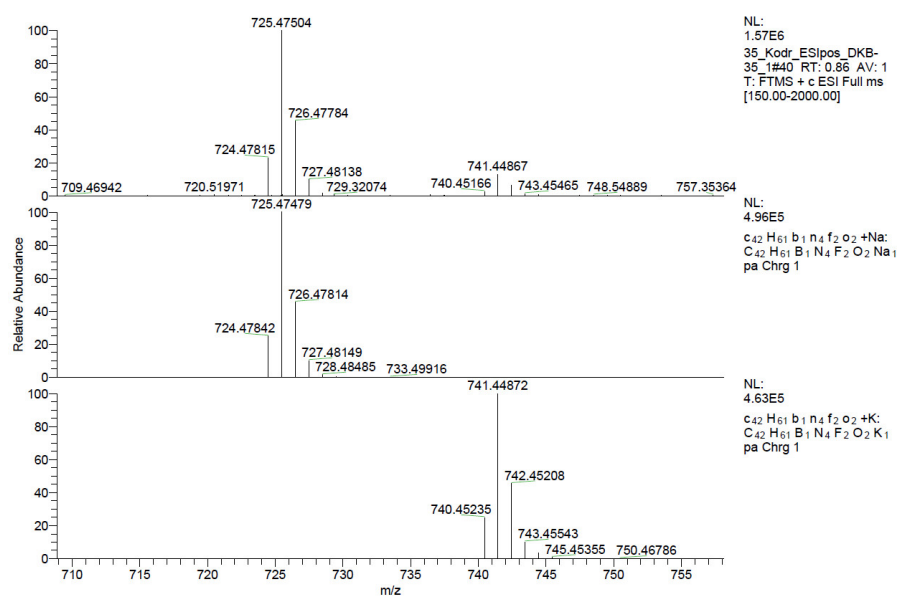

Figure S12. HRMS-ESI spectrum of **4**.

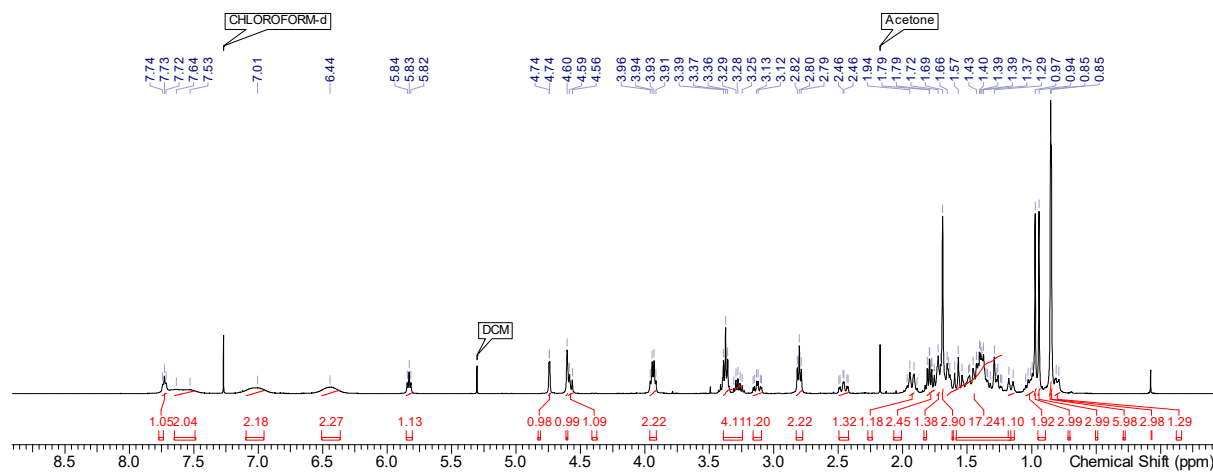

Figure S13.  $^1\text{H}$  NMR of **5** in  $\text{CDCl}_3$ .

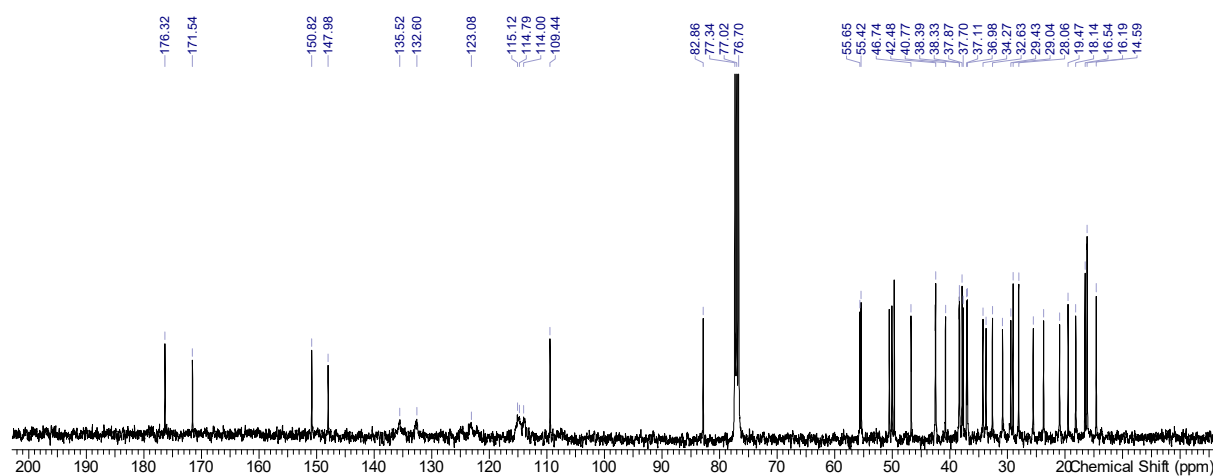

Figure S14.  $^{13}\text{C}$  NMR of **5** in  $\text{CDCl}_3$ .

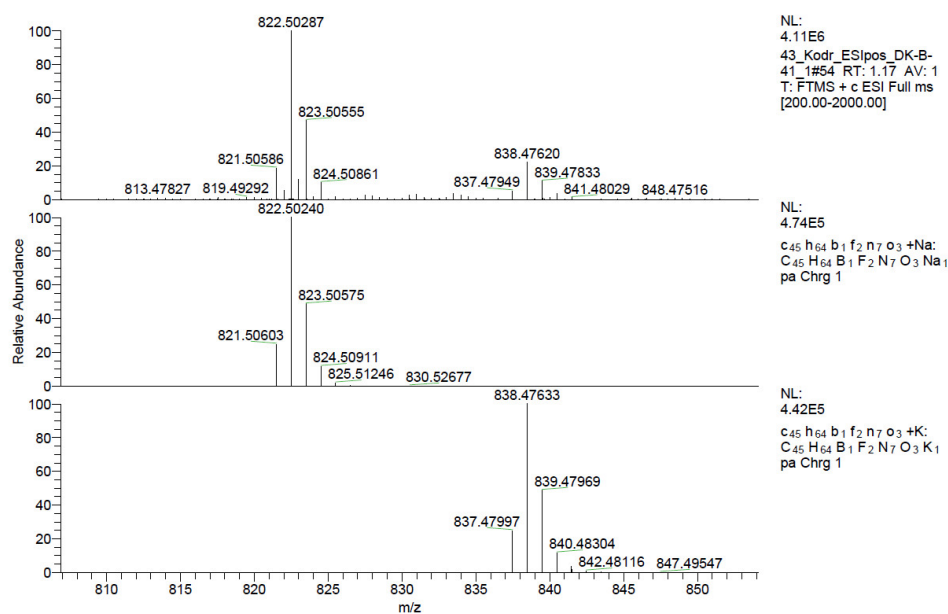

Figure S15. HRMS-ESI spectrum of **5**.

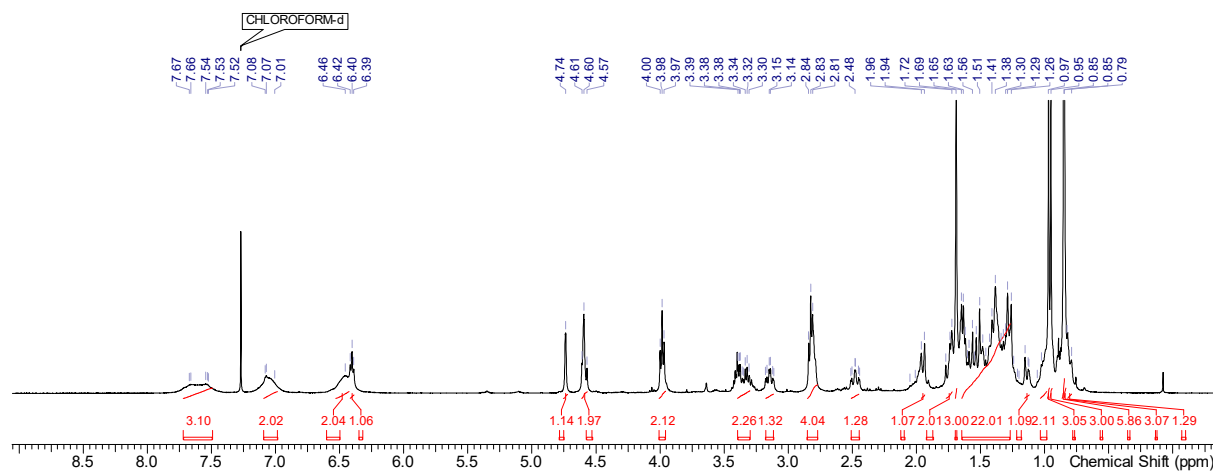

Figure S16.  $^1\text{H}$  NMR of **6** in  $\text{CDCl}_3$ .

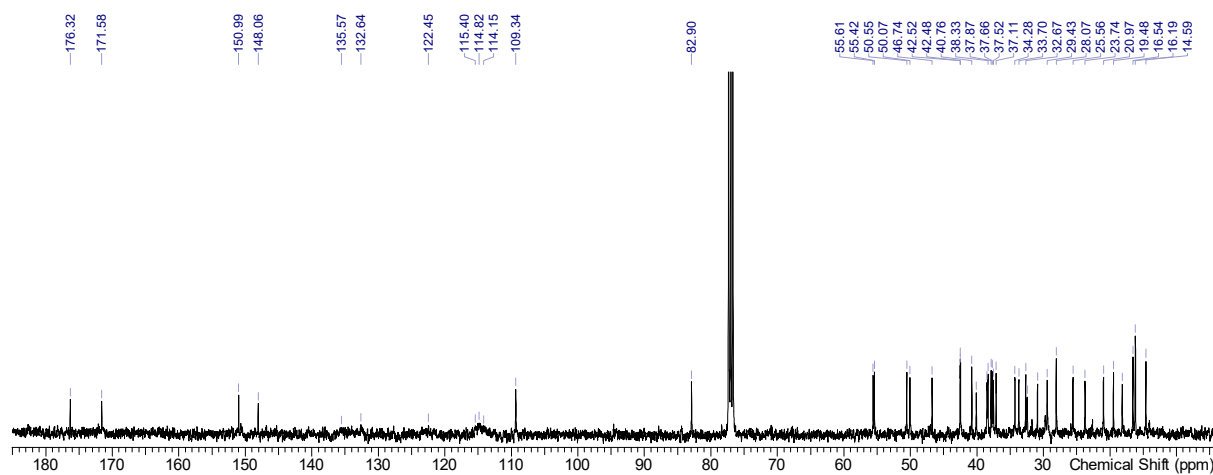

Figure S17.  $^{13}\text{C}$  NMR of **6** in  $\text{CDCl}_3$ .

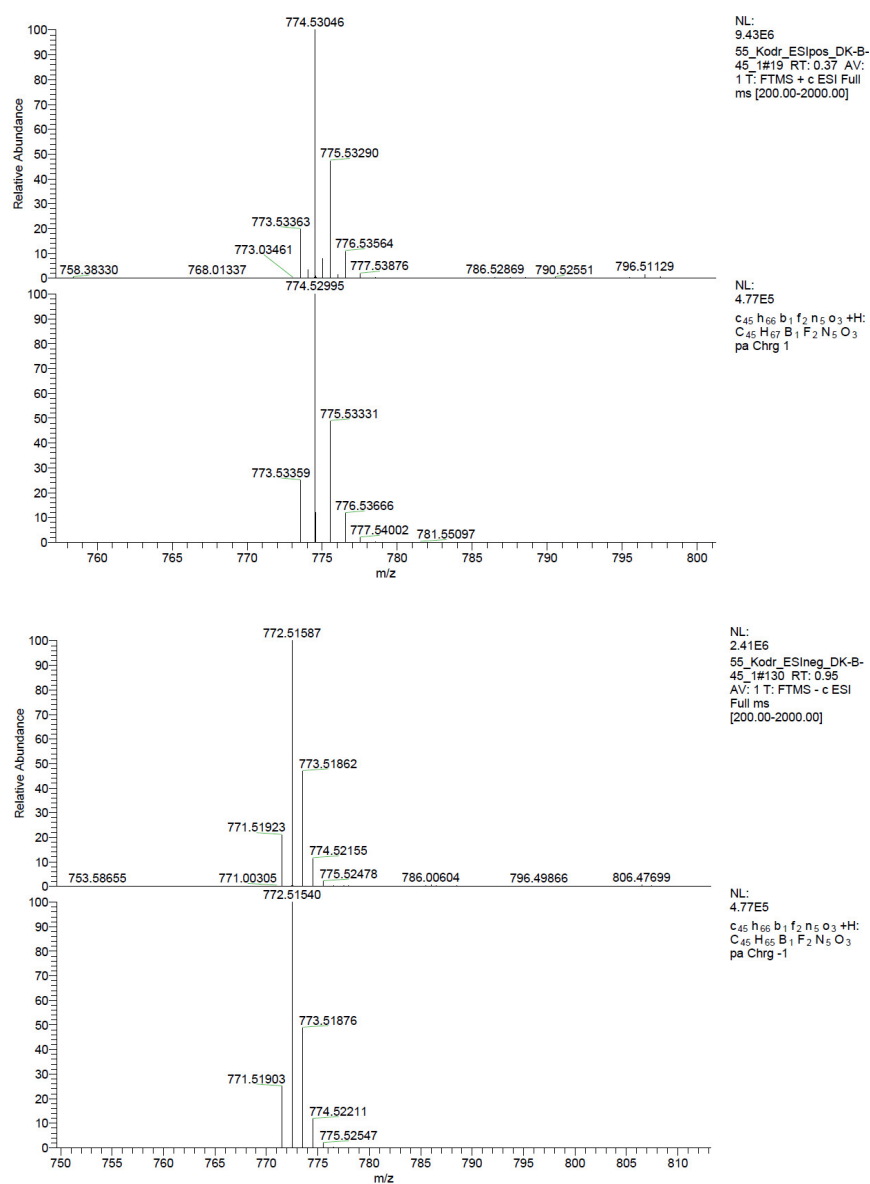

Figure S18. HRMS-ESI spectrum of 6.

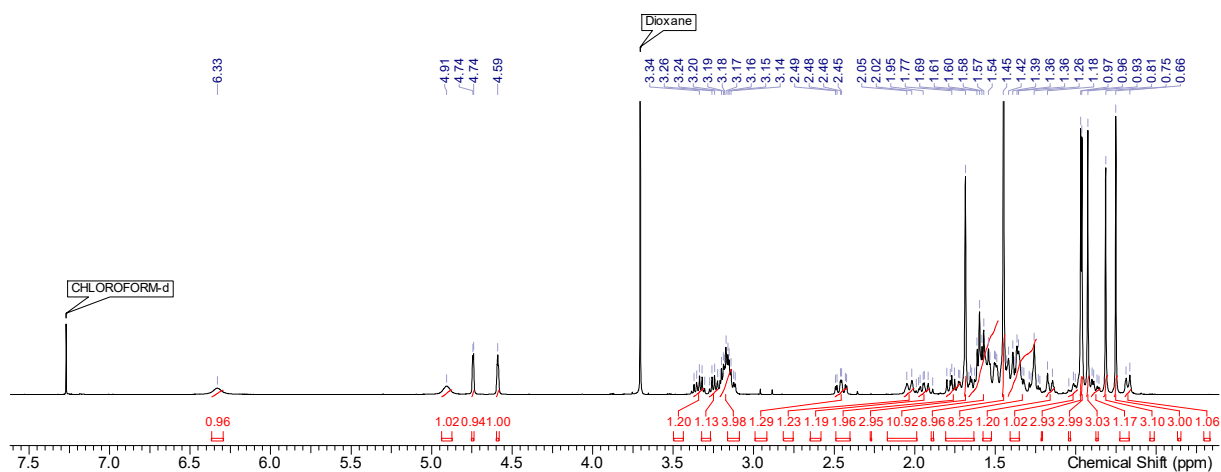

Figure S19. <sup>1</sup>H NMR of 7 in CDCl<sub>3</sub>.



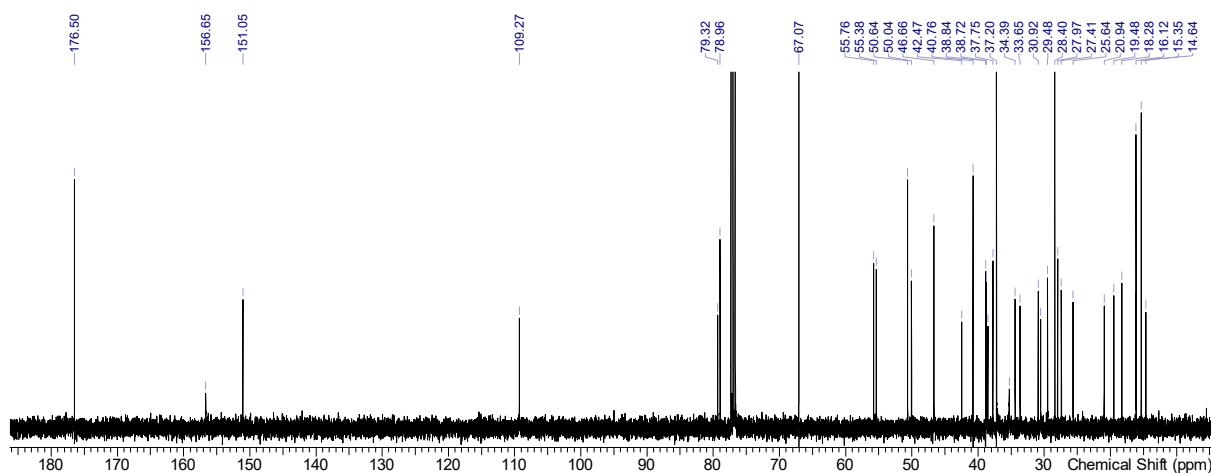

Figure S20.  $^{13}\text{C}$  NMR of **7** in  $\text{CDCl}_3$ .

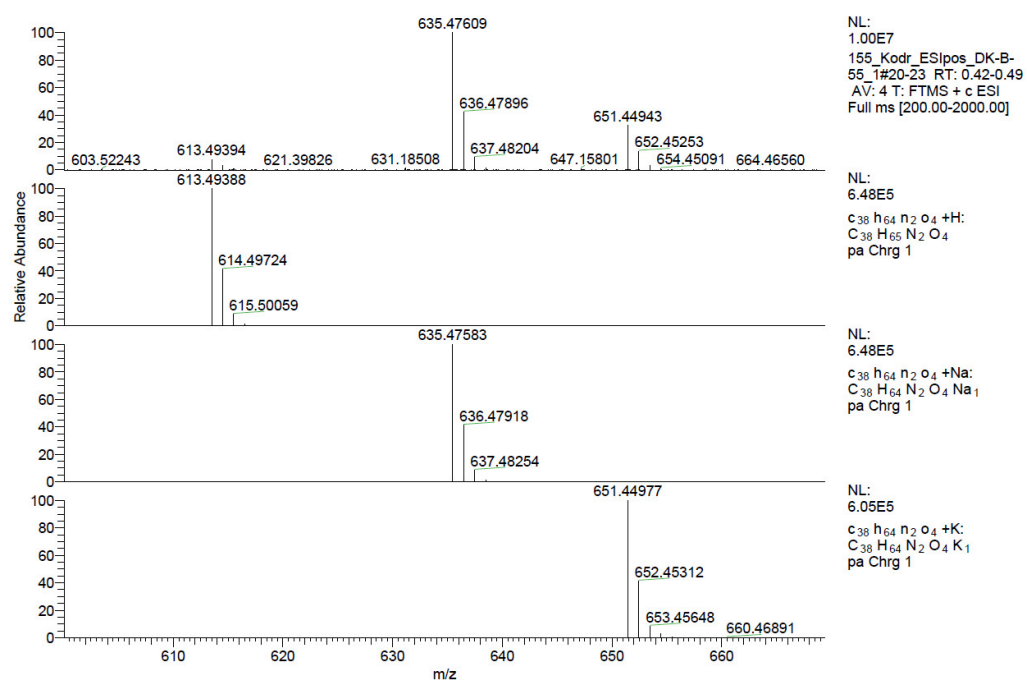

Figure S21. HRMS-ESI spectrum of **7**.

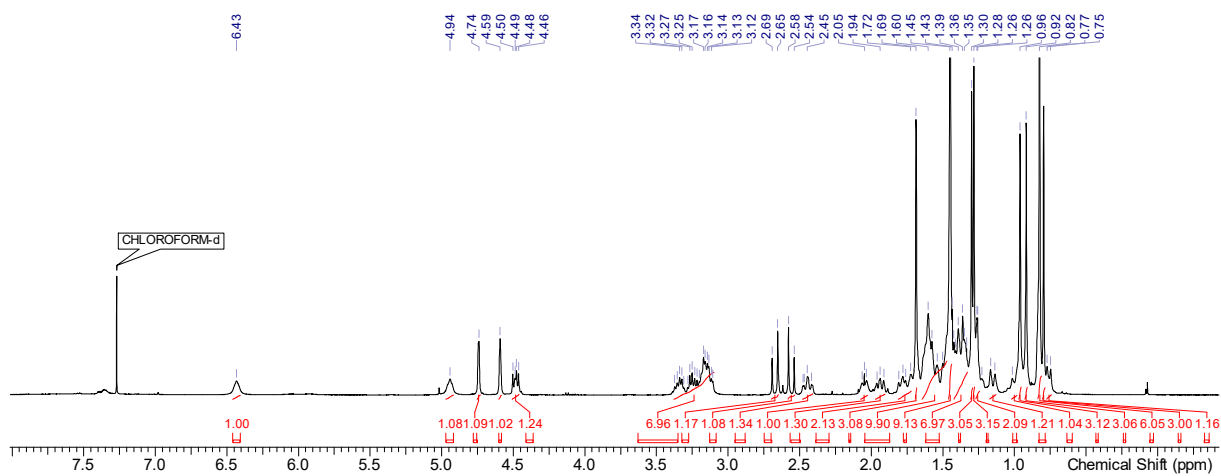

Figure S22.  $^1\text{H}$  NMR of **8** in  $\text{CDCl}_3$ .

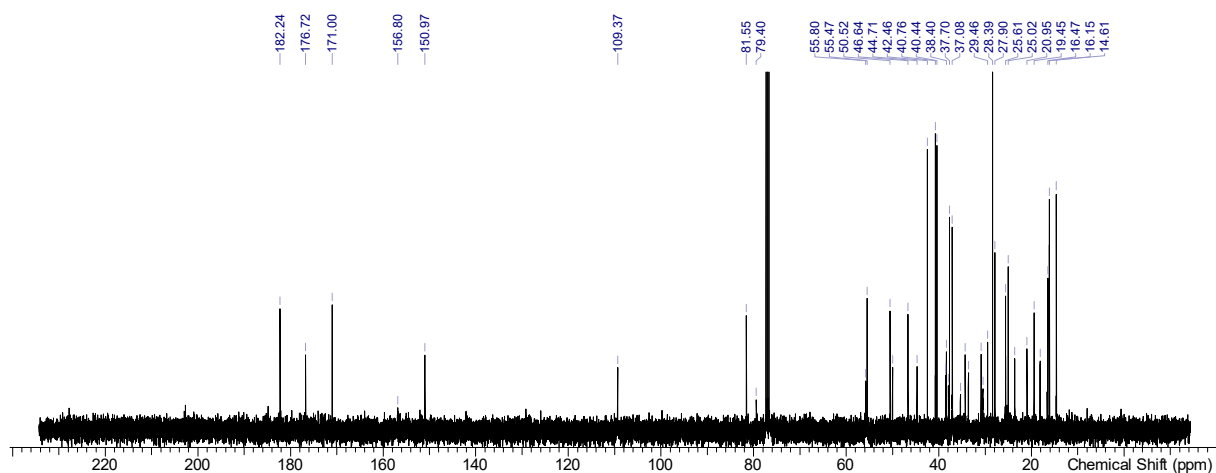

Figure S23.  $^{13}\text{C}$  NMR of **8** in  $\text{CDCl}_3$ .

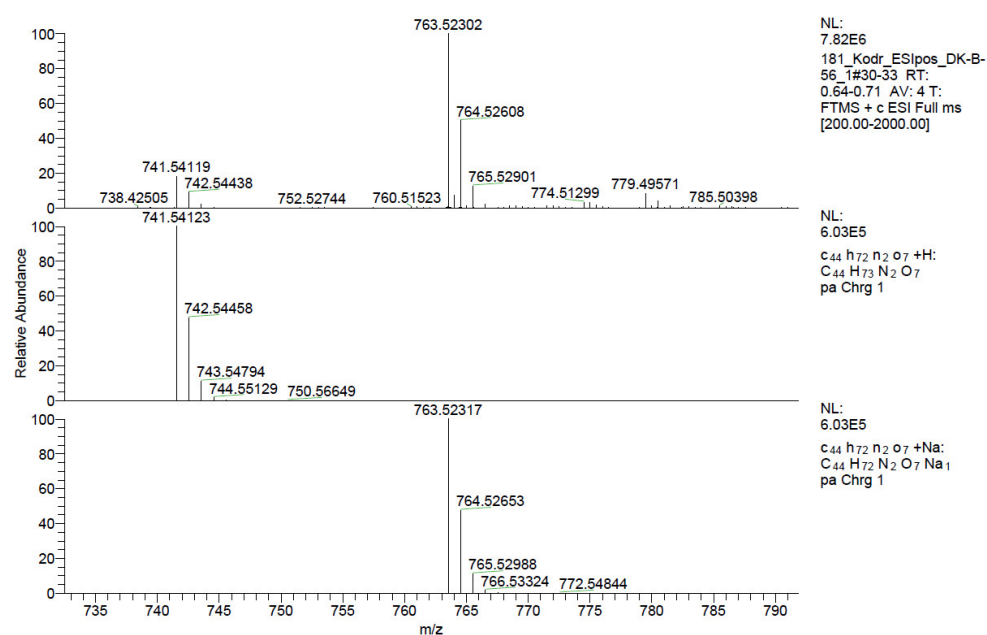

Figure S24. HRMS-ESI spectrum of **8**.

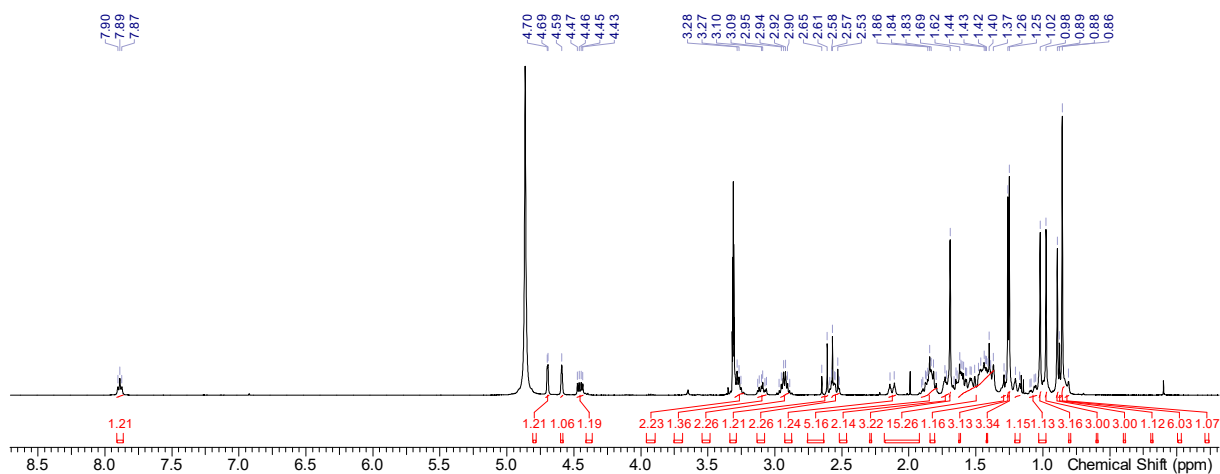

Figure S25.  $^1\text{H}$  NMR of **9** in  $\text{CD}_3\text{OD}$ .

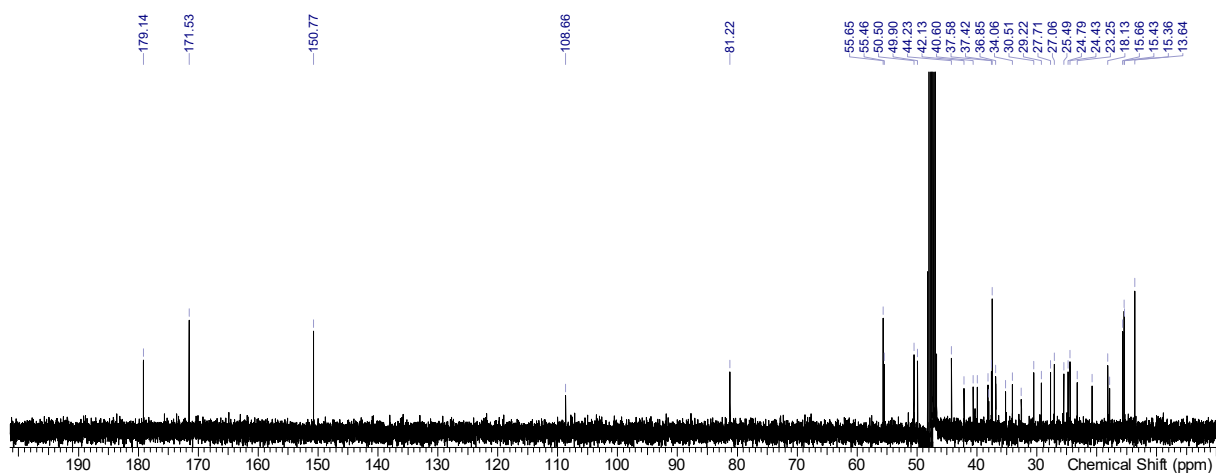

Figure S26.  $^{13}\text{C}$  NMR of **9** in  $\text{CD}_3\text{OD}$ .

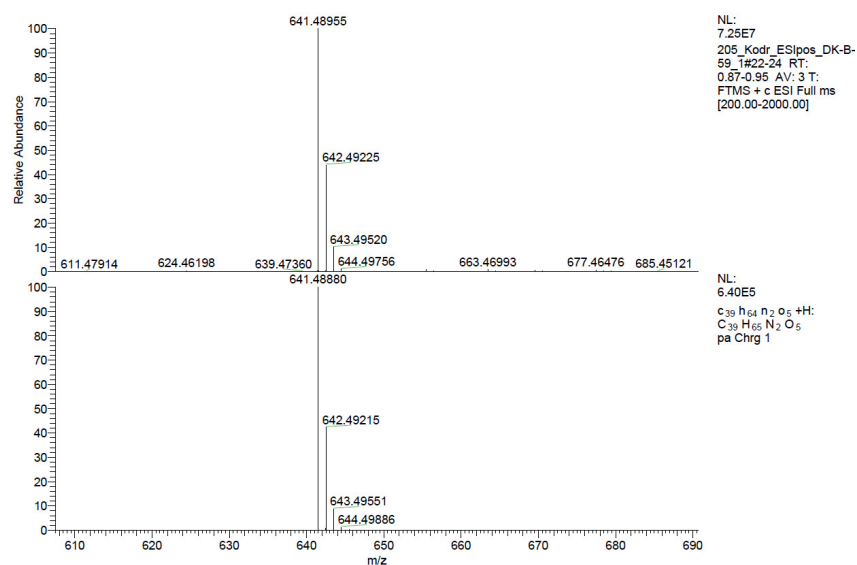

Figure S27. HRMS-ESI spectrum of **9**.

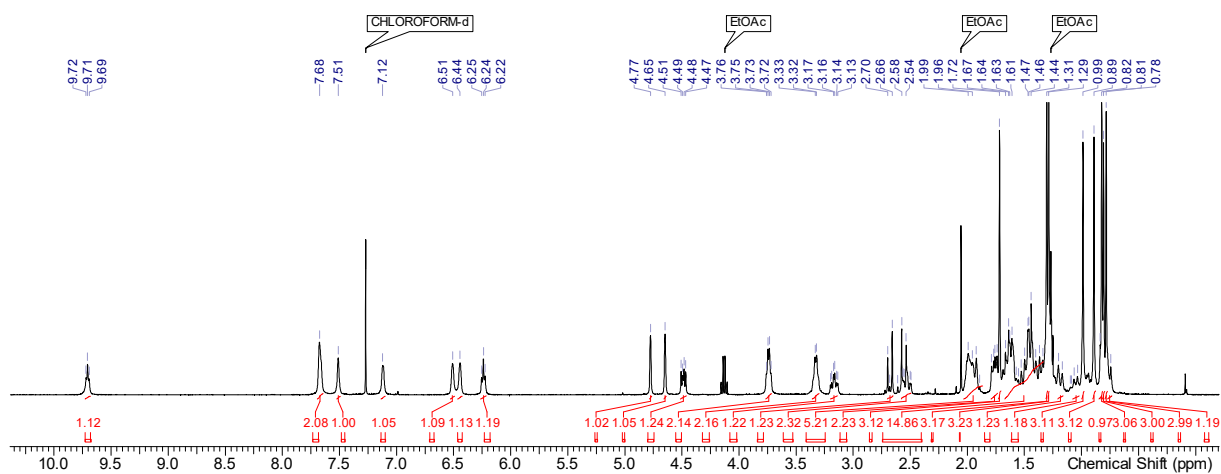

Figure S28.  $^1\text{H}$  NMR of **10** in  $\text{CDCl}_3$ .

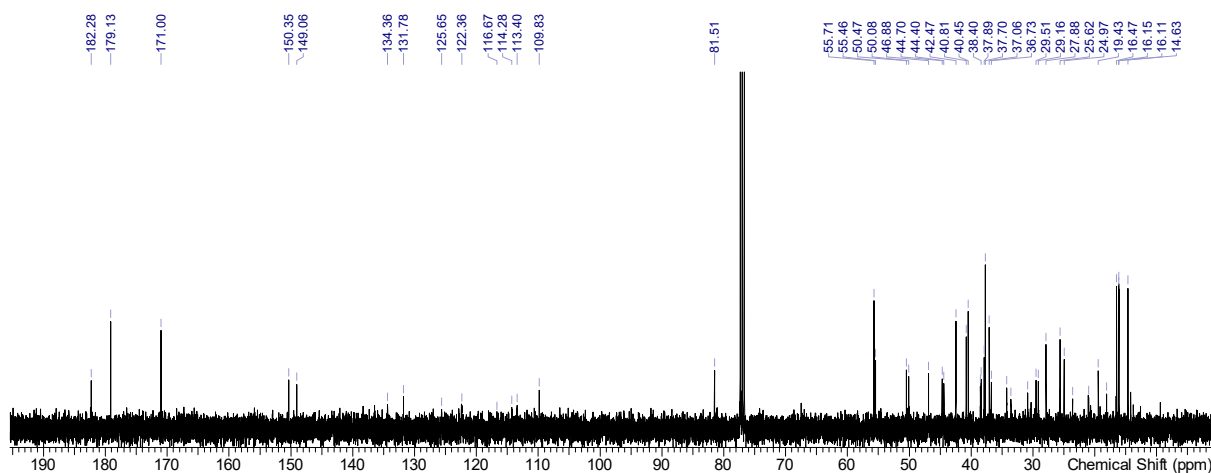

Figure S29.  $^{13}\text{C}$  NMR of 10 in  $\text{CDCl}_3$ .

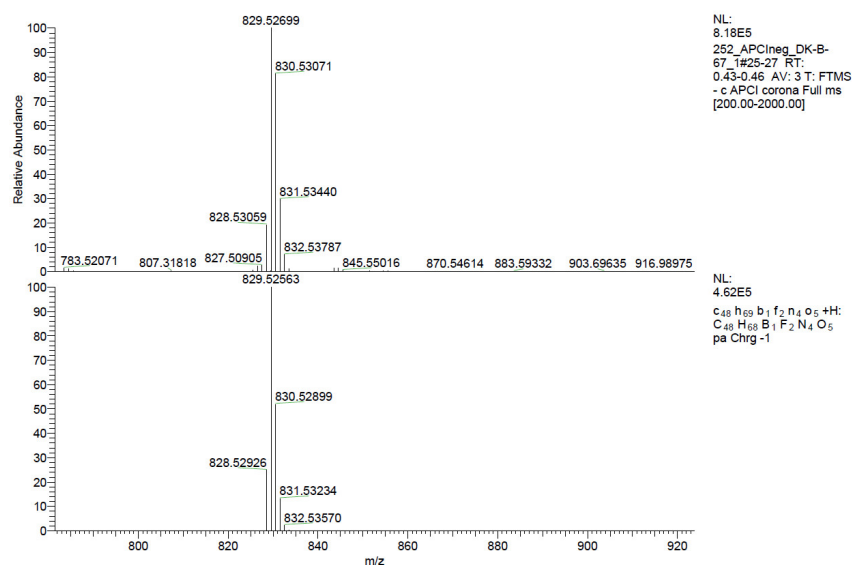

Figure S30. HRMS-APCI spectrum of 10.

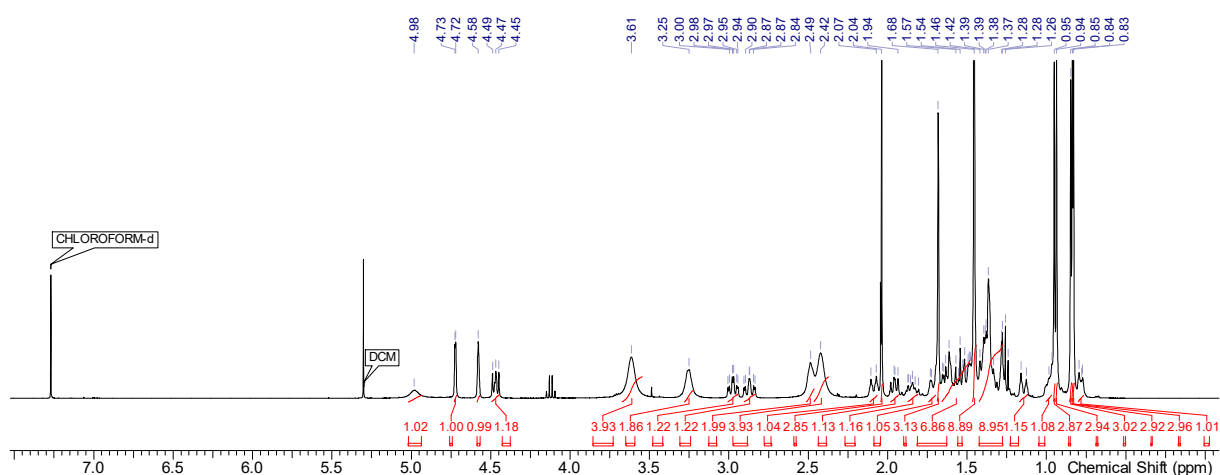

Figure S31.  $^1\text{H}$  NMR of 12 in  $\text{CDCl}_3$ .

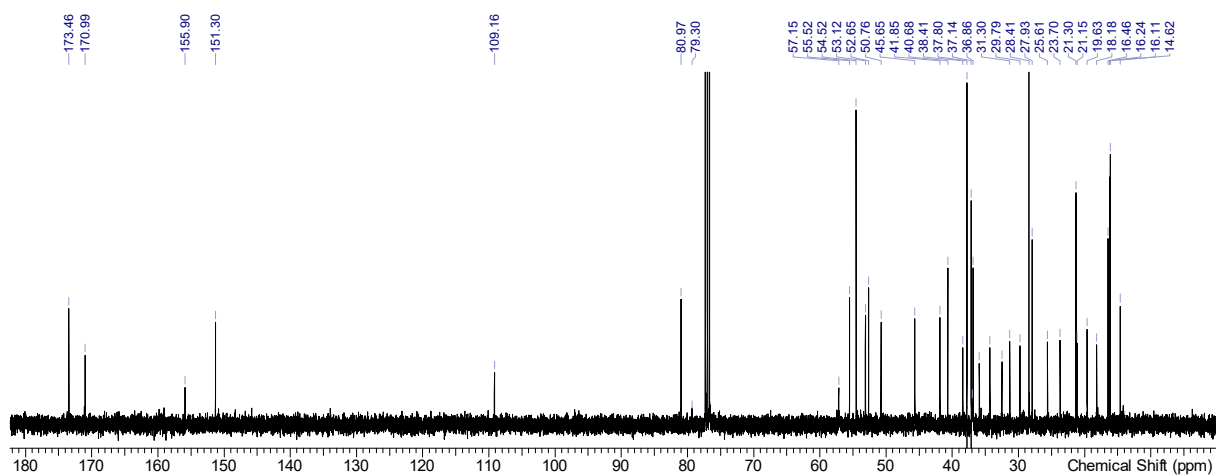

Figure S32.  $^{13}\text{C}$  NMR of **12** in  $\text{CDCl}_3$ .

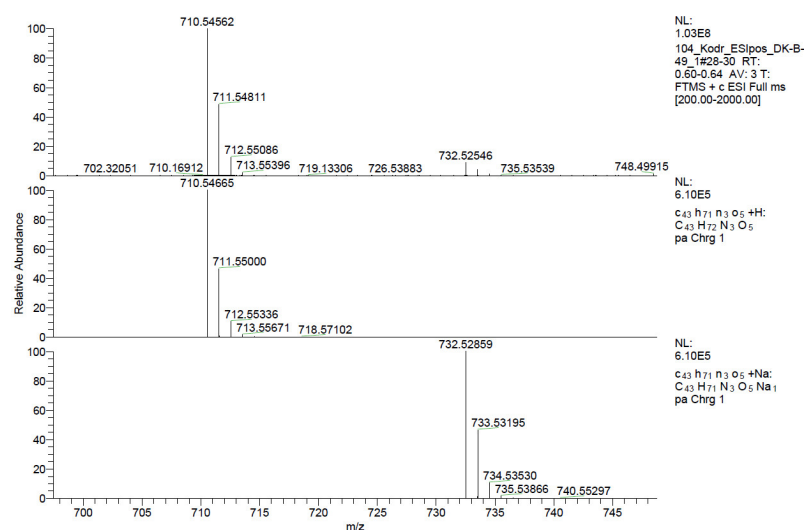

Figure S33. HRMS-ESI spectrum of **12**.

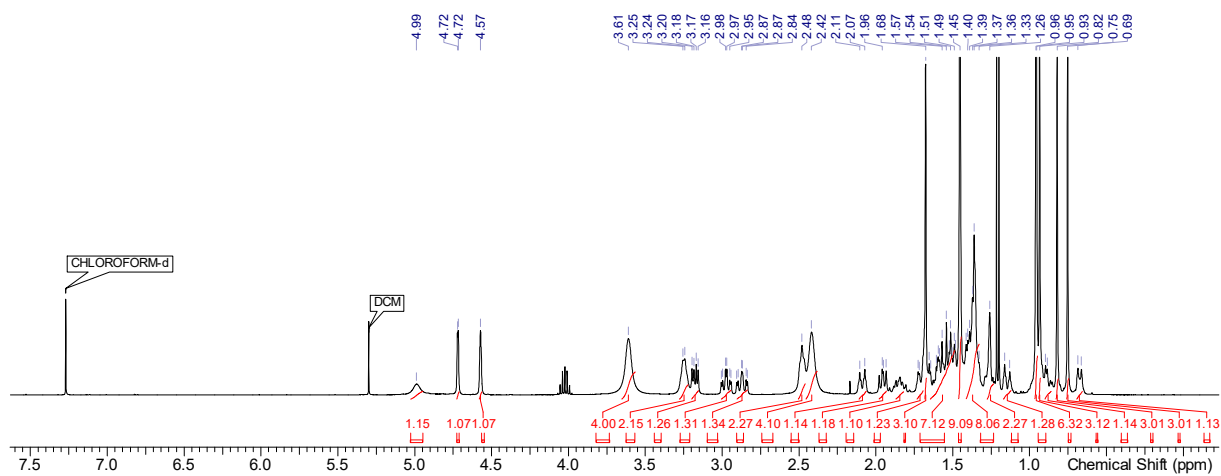

Figure S34.  $^1\text{H}$  NMR of **13** in  $\text{CDCl}_3$ .

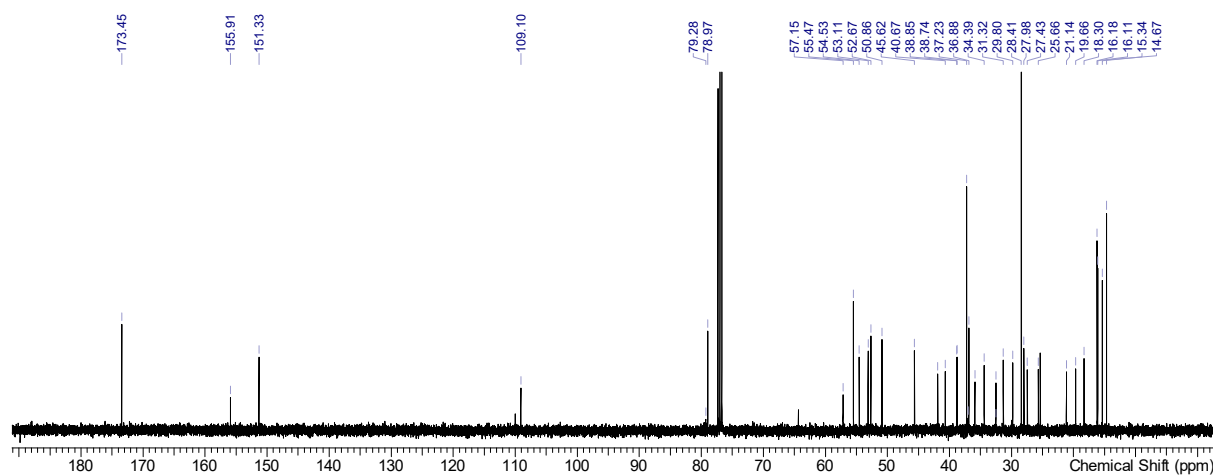

Figure S35.  $^{13}\text{C}$  NMR of **13** in  $\text{CDCl}_3$ .

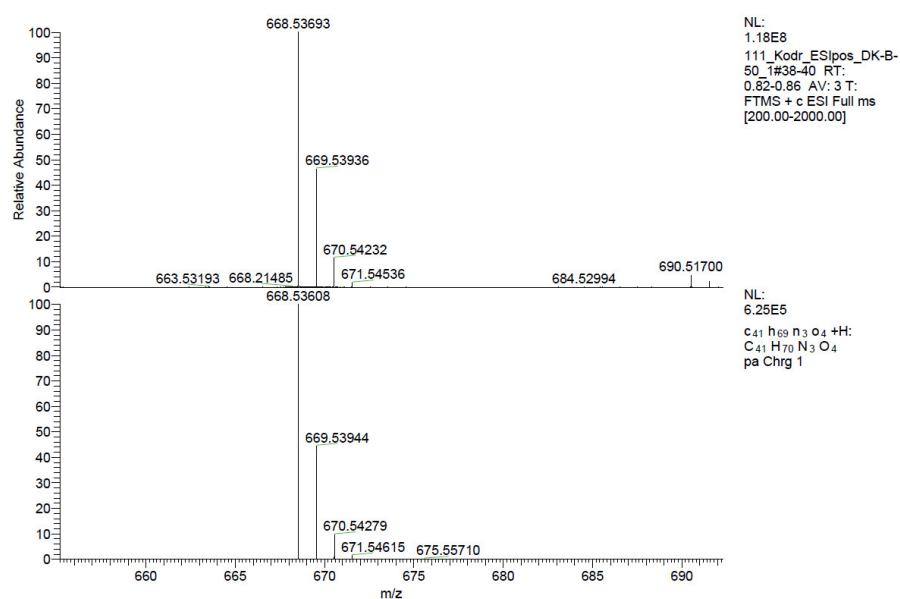

Figure S36. HRMS-ESI spectrum of **13**.

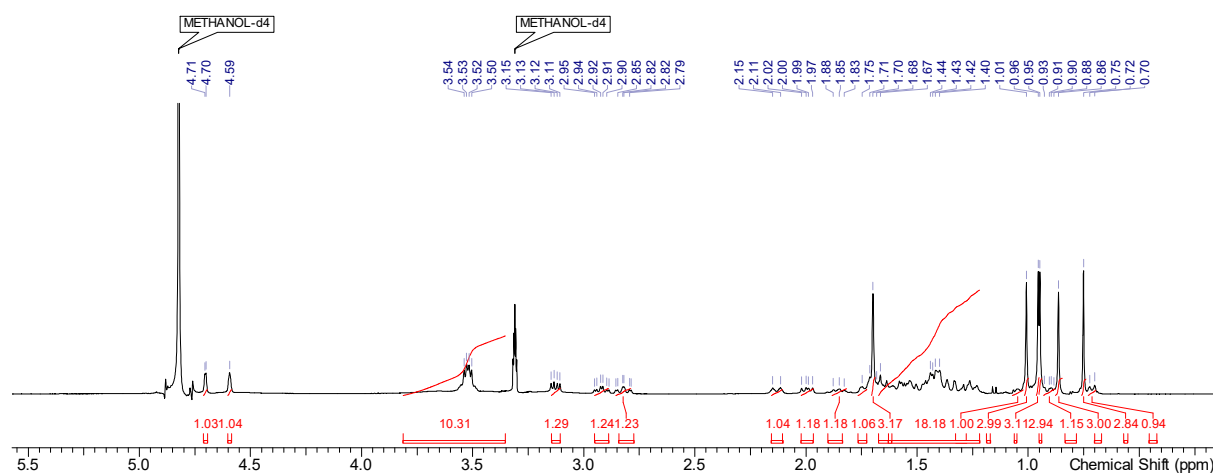

Figure S37.  $^1\text{H}$  NMR of **14** in  $\text{CDCl}_3$ .

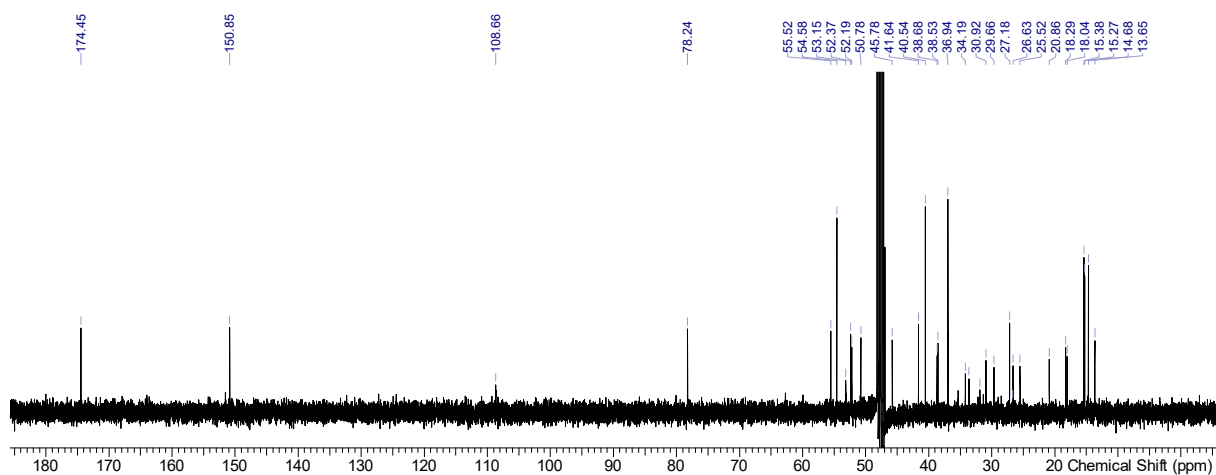

Figure S38.  $^{13}\text{C}$  NMR of **14** in  $\text{CDCl}_3$ .

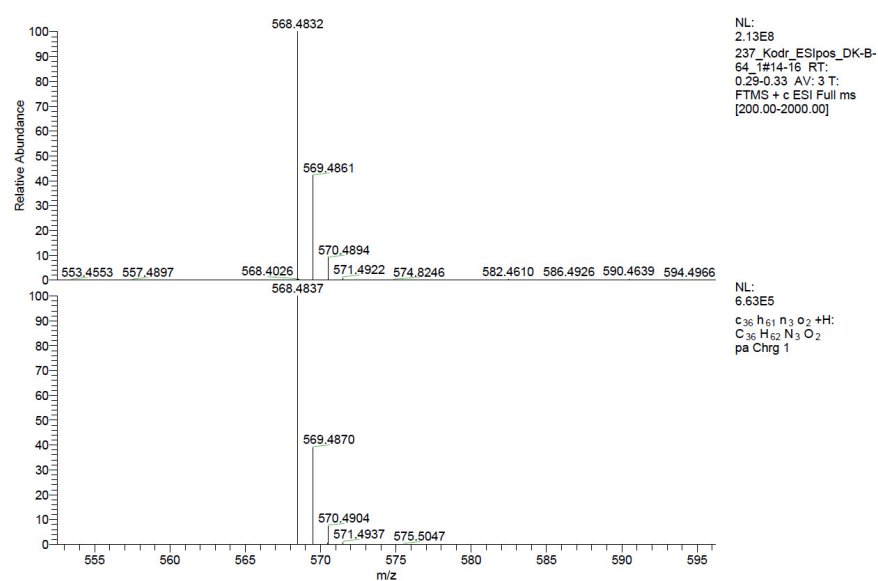

Figure S39. HRMS-ESI spectrum of **14**.

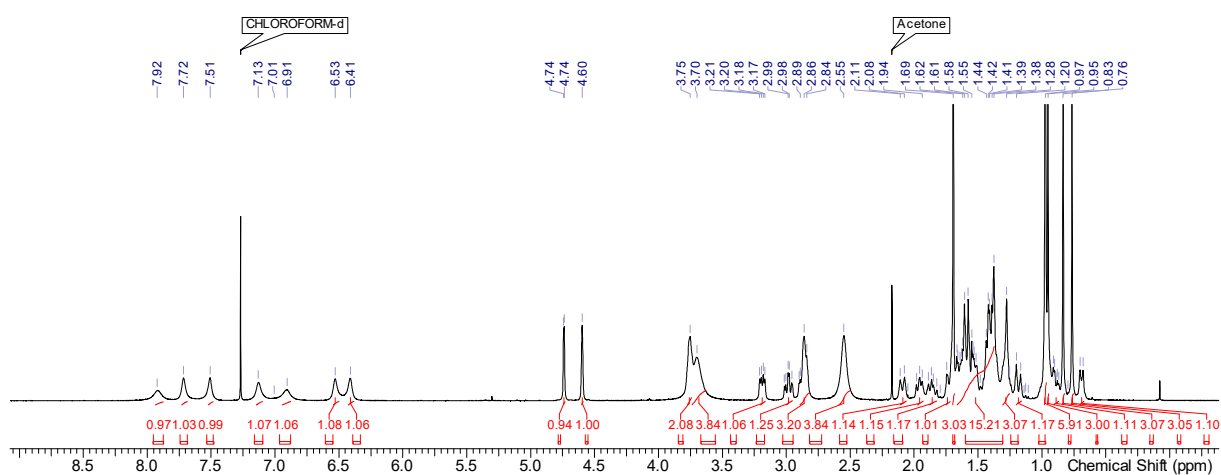

Figure S40.  $^1\text{H}$  NMR of **15** in  $\text{CDCl}_3$ .

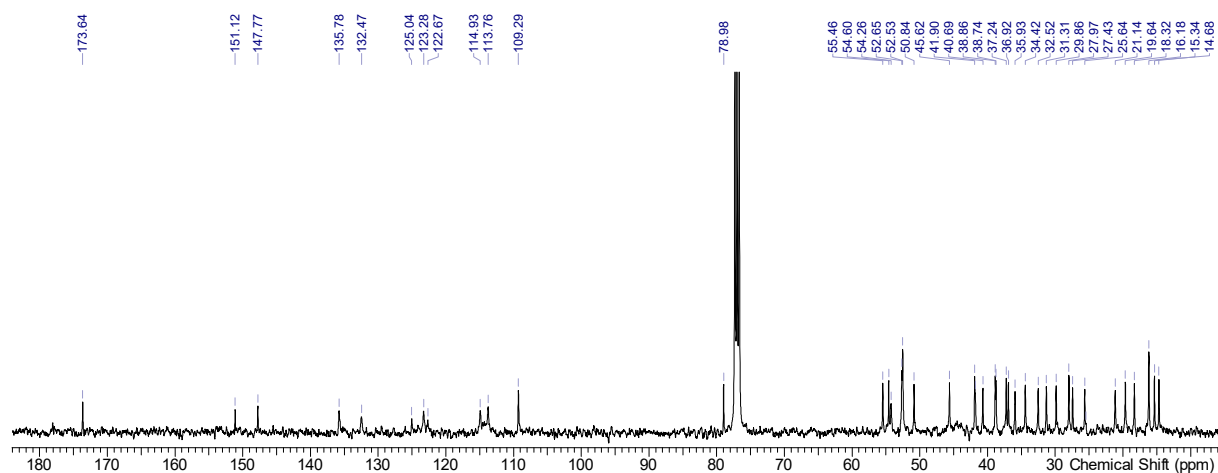

Figure S41.  $^{13}\text{C}$  NMR of **15** in  $\text{CDCl}_3$ .

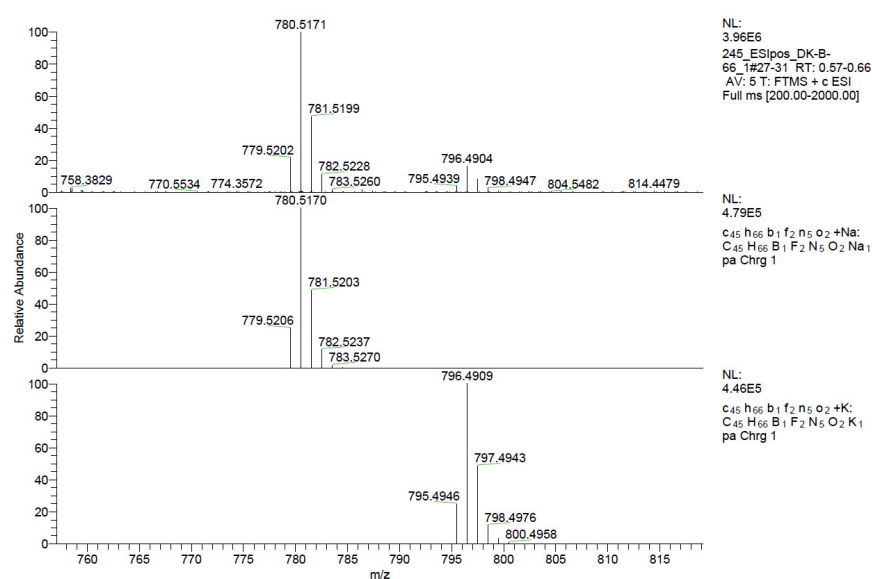

Figure S42. HRMS-ESI spectrum of **15**.

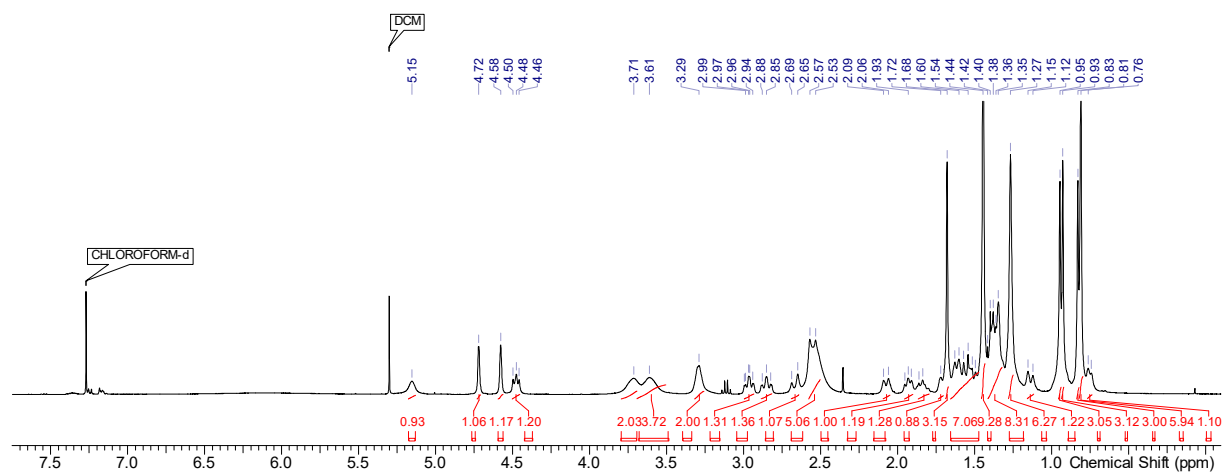

Figure S43.  $^1\text{H}$  NMR of **16** in  $\text{CDCl}_3$ .



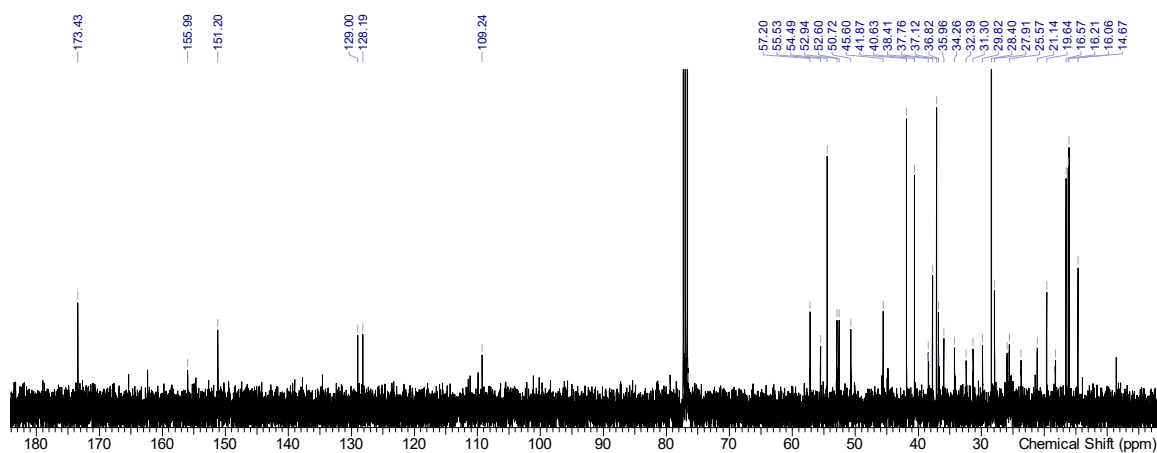

Figure S44.  $^{13}\text{C}$  NMR of 16 in  $\text{CDCl}_3$ .

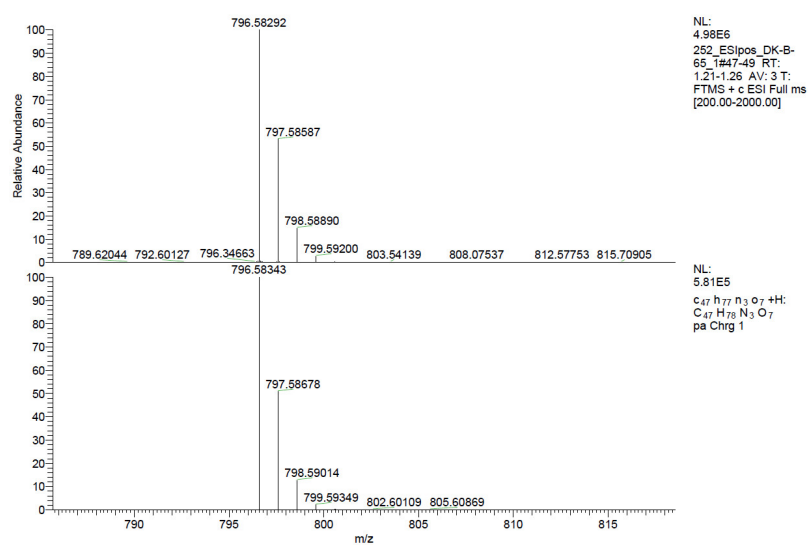

Figure S45. HRMS-ESI spectrum of 16.

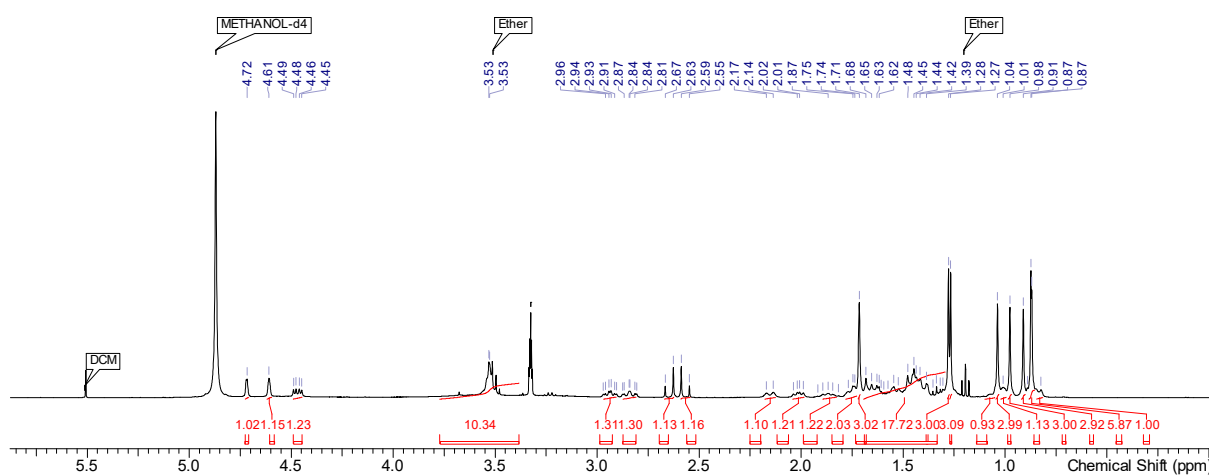

Figure S46.  $^1\text{H}$  NMR of 17 in  $\text{CD}_3\text{OD}$ .

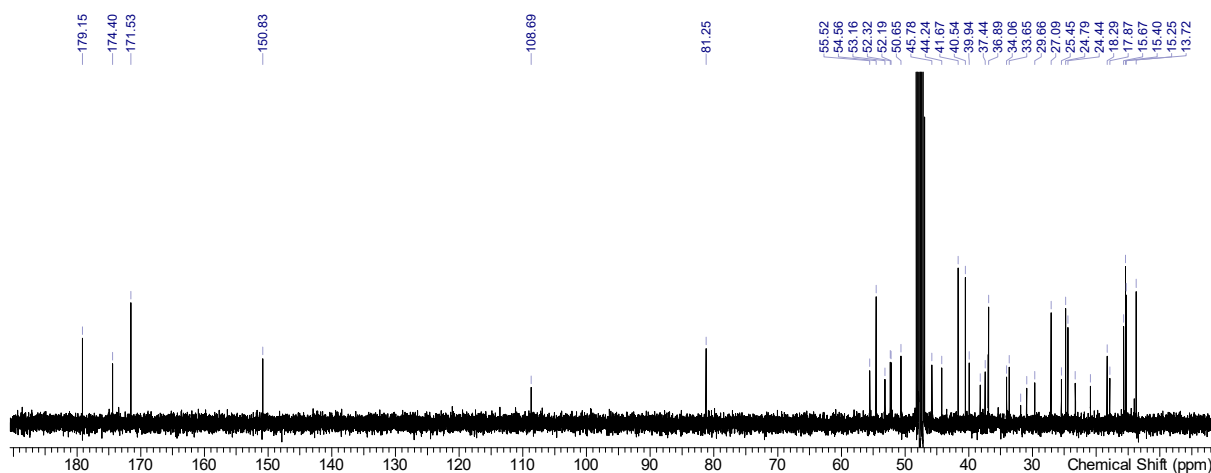

Figure S47.  $^{13}\text{C}$  NMR of 17 in  $\text{CD}_3\text{OD}$ .

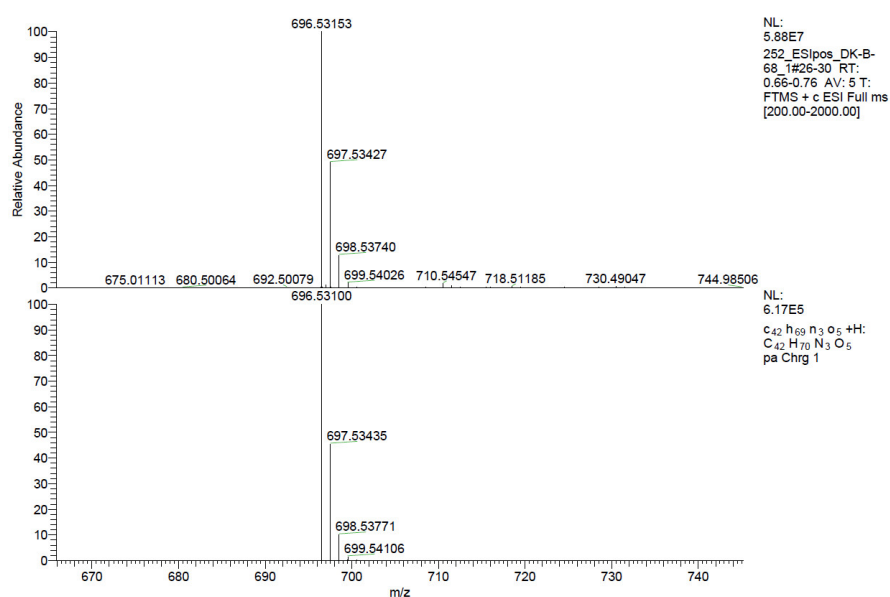

Figure S48. HRMS-ESI spectrum of 17.

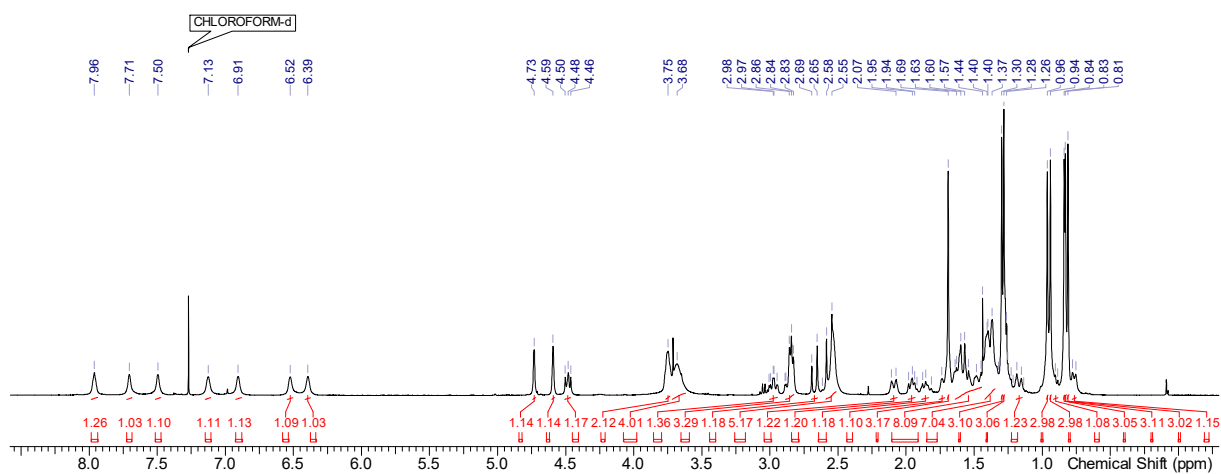

Figure S49.  $^1\text{H}$  NMR of 18 in  $\text{CDCl}_3$ .

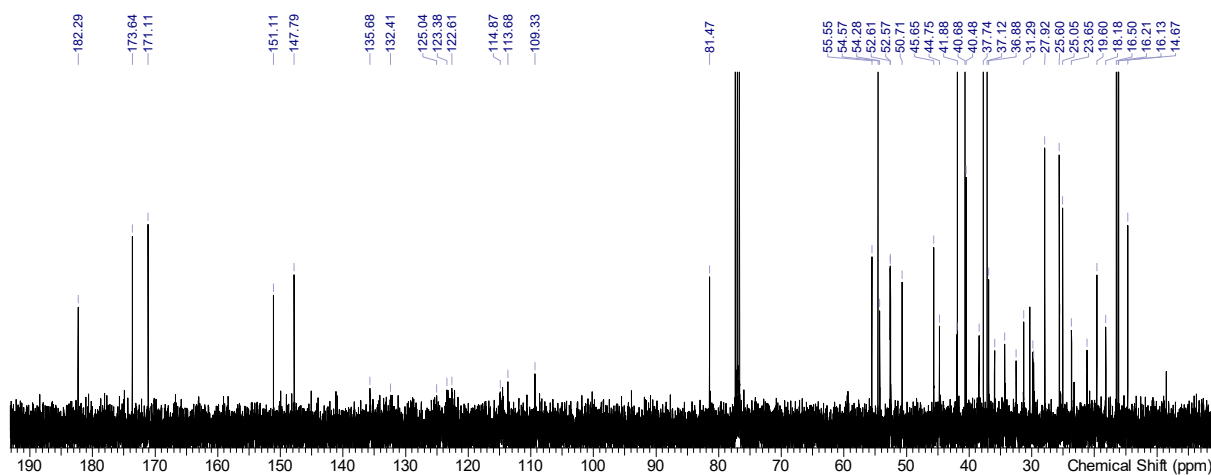

Figure S50.  $^{13}\text{C}$  NMR of **18** in  $\text{CDCl}_3$ .

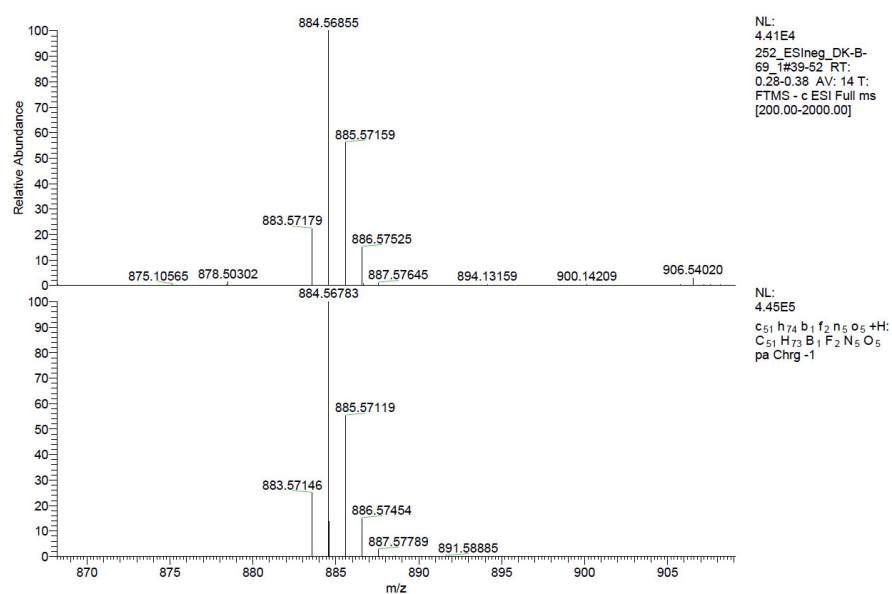

Figure S51. HRMS-ESI spectrum of **18**.

**Table S1.** Absorption maxima, emission maxima when excited at a wavelength of 380 nm, molar absorption coefficients and Stokes shifts of fluorescently labeled substances.

| Compd | $\lambda_{A, \max}$ (nm) | $\lambda_{EM, \max}$ (nm) | $\epsilon$<br>(L·mol <sup>-1</sup> ·cm <sup>-1</sup> ) | Stokes shift<br>(nm) |
|-------|--------------------------|---------------------------|--------------------------------------------------------|----------------------|
| 4     | 401                      | 462                       | 26 850                                                 | 61                   |
| 5     | 409                      | 471                       | 31 820                                                 | 62                   |
| 6     | 409                      | 468                       | 21 180                                                 | 59                   |
| 10    | 401                      | 460                       | 26 820                                                 | 59                   |
| 15    | 406                      | 460                       | 28 590                                                 | 54                   |
| 18    | 405                      | 458                       | 29 250                                                 | 53                   |

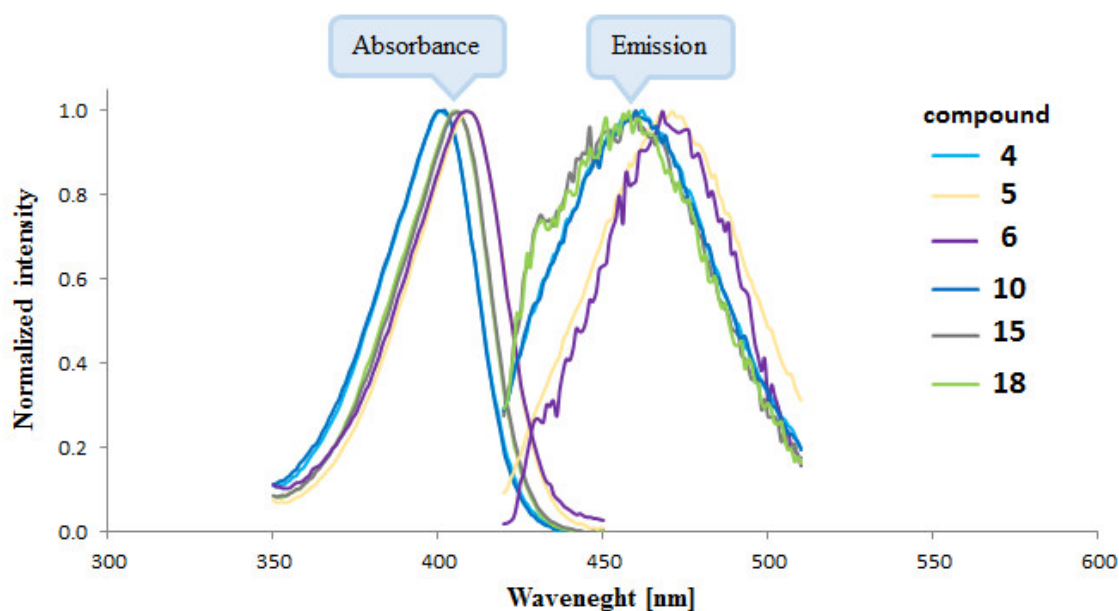

**Figure S52.** Normalized absorption and emission spectra of prepared fluorescent derivatives derived from BA.

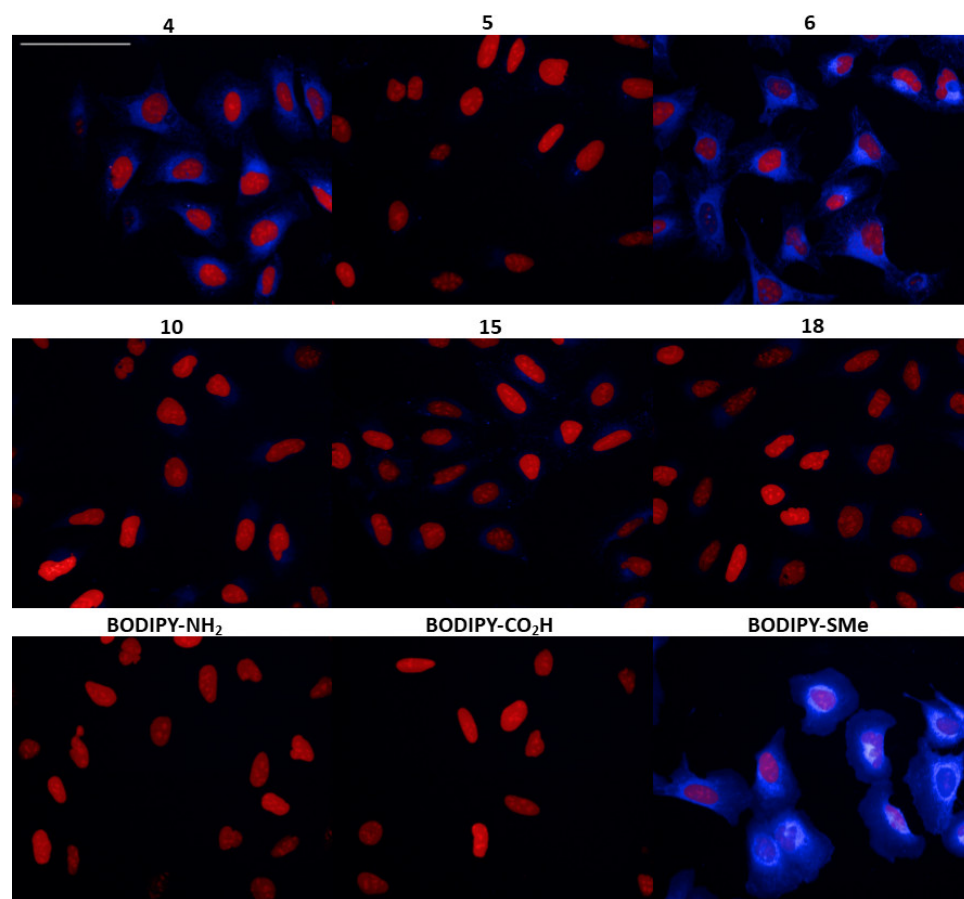

**Figure S53.** Pilot experiment with fluorescent derivatives. The size of the scale bar is 100  $\mu\text{m}$ .

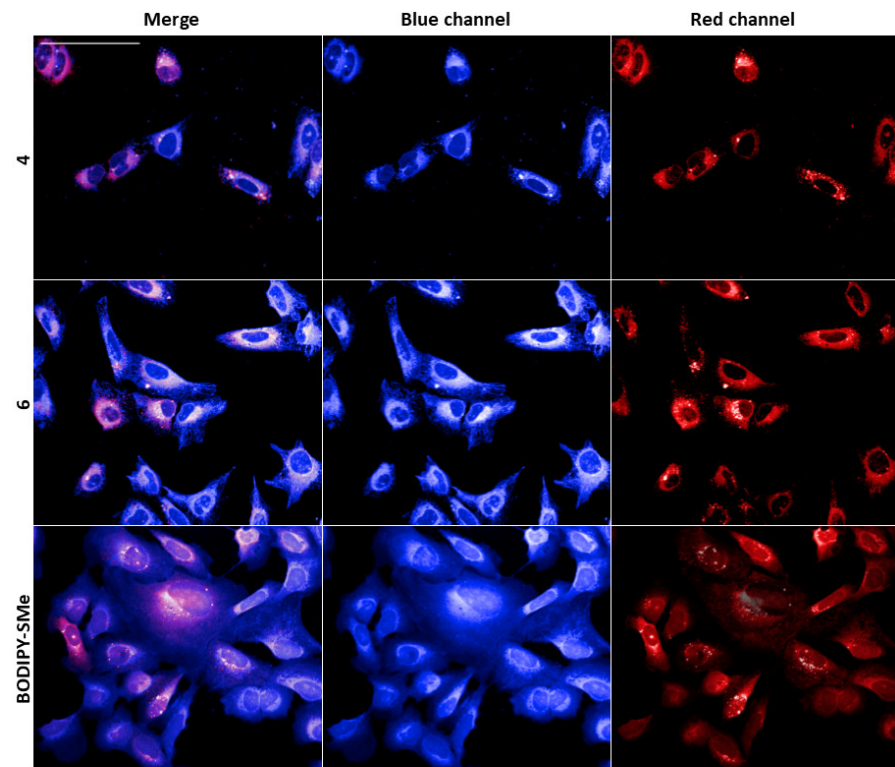

**Figure S54.** Images of U2OS-ER with entire microscopic fields. The size of the scale bar is 100  $\mu\text{m}$ .

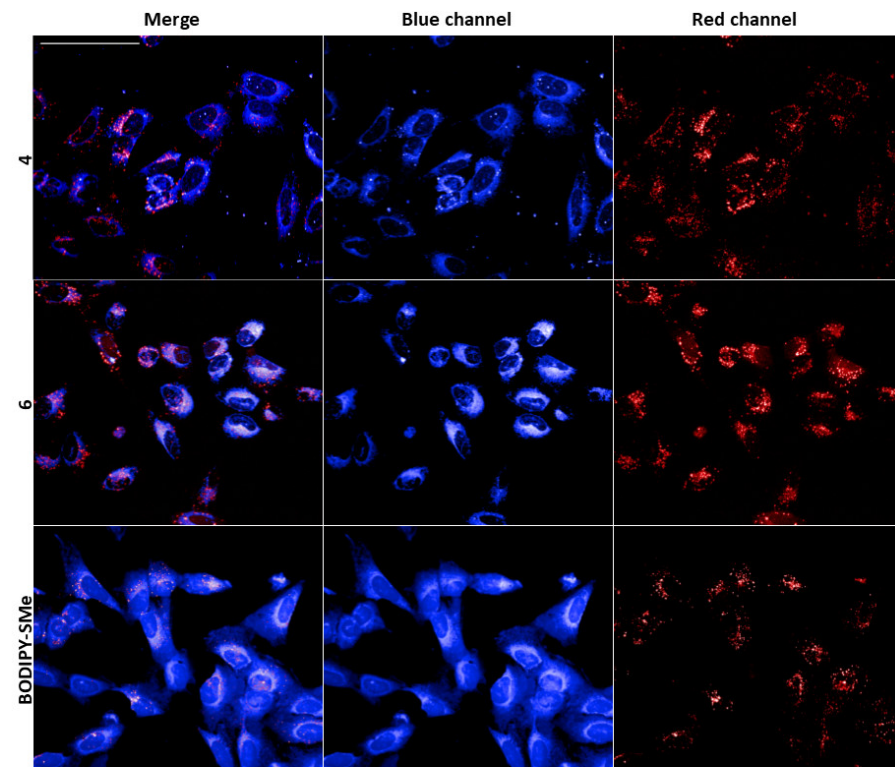

**Figure S55.** Images of U2OS-GA with entire microscopic fields. The size of the scale bar is 100  $\mu\text{m}$ .

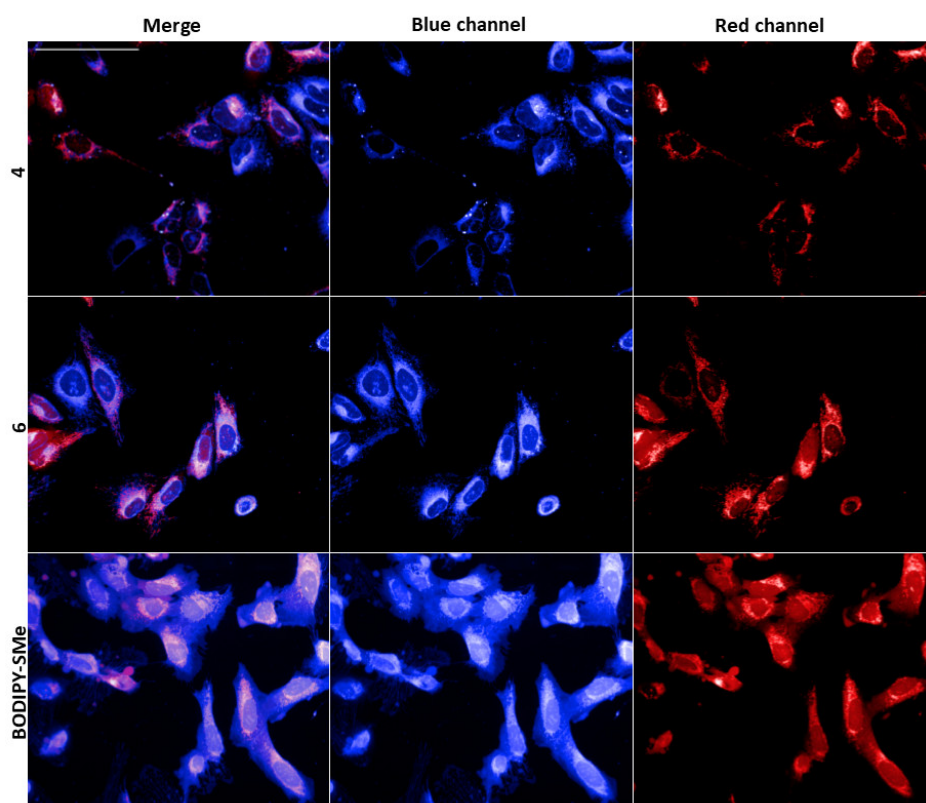

**Figure S56.** Images of U2OS-Mito with entire microscopic fields. The size of the scale bar is 100  $\mu\text{m}$ .

**Table S2.** Calculated physical properties (pKa and logP) of the derivatives.

| Compound | pKa*  | pKa   | pKa    | LogP* |
|----------|-------|-------|--------|-------|
| BA       | 4.61  | 15.19 | n.a.** | 7.85  |
| BT       | 4.48  | 4.60  | n.a.   | 9.26  |
| 1        | 15.17 | 15.82 | n.a.   | 8.08  |
| 2        | 4.48  | 15.81 | n.a.   | 9.30  |
| 3        | 15.17 | 16.00 | n.a.   | 6.47  |
| 4        | 14.67 | -     | n.a.   | 6.27  |
| 5        | n.a.  | -     | n.a.   | 7.41  |
| 6        | 9.74  | -     | n.a.   | 5.92  |
| 7        | 12.70 | 15.17 | 16.38  | 8.79  |
| 8        | 4.48  | 12.70 | 16.37  | 9.98  |
| 9        | 4.48  | 15.98 | n.a.   | 8.06  |
| 10       | 4.48  | n.a.  | n.a.   | 7.15  |
| 11       | 4.61  | n.a.  | n.a.   | 8.82  |
| 12       | 12.74 | n.a.  | n.a.   | 9.90  |
| 13       | 12.74 | 15.17 | n.a.   | 8.91  |
| 14       | 15.17 | n.a.  | n.a.   | 7.14  |
| 15       | 15.17 | n.a.  | n.a.   | 6.22  |
| 16       | 4.48  | 12.74 | n.a.   | 10.32 |
| 17       | 4.48  | n.a.  | n.a.   | 8.39  |
| 18       | 4.48  | n.a.  | n.a.   | 6.96  |

\*All values of pKa and logP (classic) were calculated with ACD/Percepta, Release 2021.1.0. For compounds 4–6 ACD/Percepta did not get reasonable value. The letter properties were calculated by PerkinElmer3D\*Pro Version 20.0.0.41. For Compound 5, PerkinElmer Chem3D\* was not able to calculate reasonable value of pKa too. \*\*n.a. not applicable.

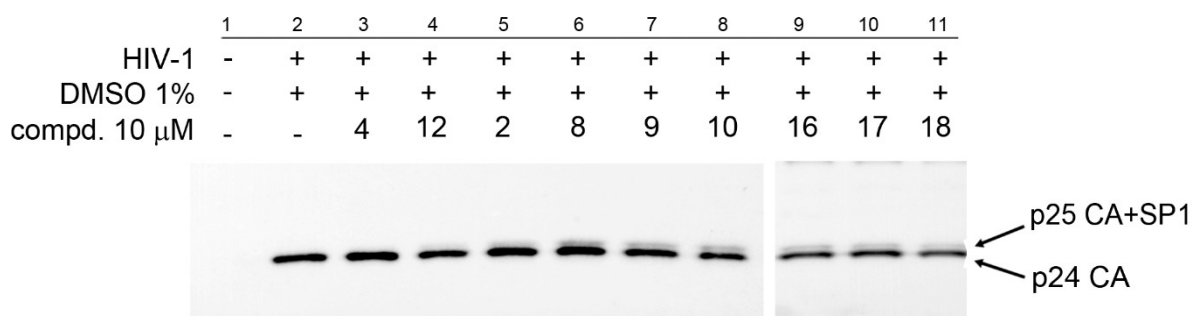

**Figure S57.** Effect of selected tested compounds on CA-SP1 processing of HIV-1 Gag polypeptide (a duplicate of western blot showed in Figure 5. in the article). HEK 293 cells produced HIV-1 particles pseudotyped with VSV-glycoproteins in the absence (lanes 2) or presence of selected tested compounds (lanes 3–11). At 48 h post-transfection, VSV-G pseudotyped HIV-1 viruses released from the HEK 293 cells were analyzed by western blot using an anti-HIV-1 CA antibody.
